# Supplementary material for: Merging metabolomics and lipidomics into one analytical run
Source: Royal Society of Chemistry journal article supplement (doi:10.1039/c8an01219a), 2018-11-09
Supplement: c8an01219a2.xlsx [file c8an01219a2.xlsx]

## Sheet: RP only
Class	LipidMolec	FA Group Key	BaseRt	MainIon	Calc Mass	Formula	MainGrade	Area	AreaRatio[sample/blank]
AcCa	AcCa 6:0	6:0	1.393	+H	259.178	C13 H25 O4 N1	A	2771000	245.902
AcCa	AcCa 8:0	8:0	1.538	+H	287.21	C15 H29 O4 N1	A	6672000	18850.2
AcCa	AcCa 10:3	10:3	1.496	+H	309.194	C17 H27 O4 N1	A	3775000	5345.67
AcCa	AcCa 10:2	10:2	1.547	+H	311.21	C17 H29 O4 N1	A	2027000	2.02697e+06
AcCa	AcCa 10:1	10:1	1.673	+H	313.225	C17 H31 O4 N1	A	12270000	4.72108e+08
AcCa	AcCa 10:0	10:0	1.84	+H	315.241	C17 H33 O4 N1	A	12720000	22028.2
AcCa	AcCa 12:1	12:1	2.053	+H	341.257	C19 H35 O4 N1	A	9435000	9.43519e+06
AcCa	AcCa 12:0	12:0	2.418	+H	343.272	C19 H37 O4 N1	A	5613000	5.61315e+06
AcCa	AcCa 14:2	14:2	2.291	+H	367.272	C21 H37 O4 N1	A	5160000	5652.52
AcCa	AcCa 14:1	14:1	2.756	+H	369.288	C21 H39 O4 N1	A	8299000	8.29888e+06
AcCa	AcCa 16:0	16:0	5.553	+H	399.335	C23 H45 O4 N1	A	10180000	1.01816e+07
AcCa	AcCa 18:2	18:2	4.468	+H	423.335	C25 H45 O4 N1	A	9669000	9.66907e+06
AcCa	AcCa 18:1	18:1	6.022	+H	425.351	C25 H47 O4 N1	A	13640000	1.36444e+07
AcCa	AcCa 18:0	18:0	7.975	+H	427.366	C25 H49 O4 N1	A	4701000	4.70064e+06
CE	CE 18:3	18:3	20.082	+NH4	646.569	C45 H74 O2	B	2476000	2.47588e+06
CE	CE 18:2	18:2	20.292	+NH4	648.585	C45 H76 O2	B	13890000	1.38924e+07
CE	CE 20:5	20:5	19.934	+NH4	670.569	C47 H74 O2	B	2651000	2.65132e+06
CE	CE 20:4	20:4	20.119	+NH4	672.585	C47 H76 O2	B	16540000	1.65408e+07
CE	CE 22:6	22:6	19.978	+NH4	696.585	C49 H76 O2	B	1936000	1.93577e+06
Cer	Cer m18:1_22:0	m40:1	18.764	+H	605.611	C40 H79 O2 N1	B	1170000	1.16955e+06
Cer	Cer d18:2_22:0	d40:2	18.512	+H	619.59	C40 H77 O3 N1	B	1746000	1.74635e+06
Cer	Cer d18:1_22:0	d40:1	18.75	+H	621.606	C40 H79 O3 N1	B	1322000	428.311
Cer	Cer m18:1_24:1	m42:2	18.748	+H	631.627	C42 H81 O2 N1	B	1071000	1.07077e+06
Cer	Cer m18:1_24:0	m42:1	18.979	+H	633.642	C42 H83 O2 N1	B	1010000	1.0102e+06
Cer	Cer d18:1_23:0	d41:1	18.856	+H	635.622	C41 H81 O3 N1	B	917800	332.583
Cer	Cer d18:2_24:1	d42:3	18.49	+H	645.606	C42 H79 O3 N1	B	2415000	1207303570
Cer	Cer d18:2_24:0	d42:2	18.735	+H	647.622	C42 H81 O3 N1	A	7335000	9937.48
Cer	Cer d18:1_24:0	d42:1	18.944	+H	649.637	C42 H83 O3 N1	B	1950000	436.487
DG	DG 18:1_14:0	32:1	17.949	+NH4	566.491	C35 H66 O5	A	12960000	9231.32
DG	DG 16:0_16:0	32:0	18.35	+NH4	568.507	C35 H68 O5	A	11110000	49.796
DG	DG 16:1_18:2	34:3	17.494	+NH4	590.491	C37 H66 O5	A	10040000	1.00432e+07
DG	DG 16:1_18:1	34:2	18.043	+NH4	592.507	C37 H68 O5	A	61960000	35503.2
DG	DG 16:0_18:1	34:1	18.367	+NH4	594.522	C37 H70 O5	A	61050000	2547.3
DG	DG 18:2_18:2	36:4	17.626	+NH4	616.507	C39 H68 O5	A	28920000	2.89218e+07
DG	DG 18:1_18:2	36:3	18.075	+NH4	618.522	C39 H70 O5	A	94400000	44434.3
DG	DG 18:1_18:1	36:2	18.392	+NH4	620.538	C39 H72 O5	A	87450000	4435.97
DG	DG 18:0_18:1	36:1	18.665	+NH4	622.554	C39 H74 O5	A	8613000	781.268
DG	DG 18:0_18:0	36:0	18.883	+NH4	624.569	C39 H76 O5	A	2178000	5.791
DG	DG 18:2_20:4	38:6	17.453	+NH4	640.507	C41 H68 O5	A	8903000	8.90309e+06
DG	DG 18:1_20:4	38:5	17.951	+NH4	642.522	C41 H70 O5	A	12530000	1.39243e+09
Hex2Cer	Hex2Cer d18:1_16:0	d34:1	15.88	+H	861.618	C46 H87 O13 N1	A	6005000	6.00478e+06
LPC	LPC 14:0	14:0	3.442	+H	467.301	C22 H46 O7 N1 P1	B	3397000	3.39735e+06
LPC	LPC 14:0	14:0	3.766	+H	467.301	C22 H46 O7 N1 P1	A	39240000	3.92367e+07
LPC	LPC O-16:1	O-16:1	6.818	+H	479.338	C24 H50 O6 N1 P1	B	22860000	2.28608e+07
LPC	LPC 15:0	15:0	4.328	+H	481.317	C23 H48 O7 N1 P1	B	4253000	4.25282e+06
LPC	LPC 15:0	15:0	4.736	+H	481.317	C23 H48 O7 N1 P1	A	25060000	2.50589e+07
LPC	LPC O-16:0	O-16:0	7.02	+H	481.353	C24 H52 O6 N1 P1	B	27100000	2.70955e+07
LPC	LPC 16:1	16:1	3.816	+H	493.317	C24 H48 O7 N1 P1	B	6226000	6.2258e+06
LPC	LPC 16:1	16:1	4.159	+H	493.317	C24 H48 O7 N1 P1	A	95110000	9.51136e+07
LPC	LPC 16:0	16:0	5.401	+H	495.332	C24 H50 O7 N1 P1	A	347300000	616499
LPC	LPC 16:0	16:0	5.893	+H	495.332	C24 H50 O7 N1 P1	A	3695000000	476327
LPC	LPC O-18:2	O-18:2	7.257	+H	505.353	C26 H52 O6 N1 P1	B	2796000	2.7965e+06
LPC	LPC 17:1	17:1	5.193	+H	507.332	C25 H50 O7 N1 P1	B	6622000	6.62212e+06
LPC	LPC O-18:1	O-18:1	7.437	+H	507.369	C26 H54 O6 N1 P1	B	14500000	1.4499e+07
LPC	LPC 17:0	17:0	6.73	+H	509.348	C25 H52 O7 N1 P1	A	9652000	9.65191e+06
LPC	LPC 17:0	17:0	7.168	+H	509.348	C25 H52 O7 N1 P1	A	33650000	3.3645e+07
LPC	LPC O-18:0	O-18:0	9.661	+H	509.385	C26 H56 O6 N1 P1	B	11920000	16644.3
LPC	LPC 18:3	18:3	3.571	+H	517.317	C26 H48 O7 N1 P1	B	10800000	1.07997e+07
LPC	LPC 18:2	18:2	4.342	+H	519.332	C26 H50 O7 N1 P1	A	124400000	841922
LPC	LPC 18:2	18:2	4.713	+H	519.332	C26 H50 O7 N1 P1	A	1316000000	7.85022e+06
LPC	LPC 18:1	18:1	5.902	+H	521.348	C26 H52 O7 N1 P1	B	71350000	7.13471e+07
LPC	LPC 18:1	18:1	6.364	+H	521.348	C26 H52 O7 N1 P1	A	765300000	7.65275e+08
LPC	LPC 18:0	18:0	7.929	+H	523.364	C26 H54 O7 N1 P1	B	133900000	1.33906e+08
LPC	LPC 18:0	18:0	8.457	+H	523.364	C26 H54 O7 N1 P1	A	1360000000	431133
LPC	LPC 20:5	20:5	3.313	+H	541.317	C28 H48 O7 N1 P1	B	2046000	2.04571e+06
LPC	LPC 20:4	20:4	4.213	+H	543.332	C28 H50 O7 N1 P1	B	39860000	3.98638e+07
LPC	LPC 20:4	20:4	4.523	+H	543.332	C28 H50 O7 N1 P1	A	263700000	2.63731e+08
LPC	LPC 20:3	20:3	5.043	+H	545.348	C28 H52 O7 N1 P1	B	7983000	7.98333e+06
LPC	LPC 20:3	20:3	5.424	+H	545.348	C28 H52 O7 N1 P1	A	86100000	8.6102e+07
LPC	LPC 20:2	20:2	6.868	+H	547.364	C28 H54 O7 N1 P1	B	10350000	1.03535e+07
LPC	LPC 22:6	22:6	3.937	+H	567.332	C30 H50 O7 N1 P1	B	4411000	4.41128e+06
LPC	LPC 22:6	22:6	4.205	+H	567.332	C30 H50 O7 N1 P1	B	36500000	3.6499e+07
LPC	LPC 22:5	22:5	4.51	+H	569.348	C30 H52 O7 N1 P1	B	2366000	2.36566e+06
LPC	LPC 22:5	22:5	4.833	+H	569.348	C30 H52 O7 N1 P1	B	14140000	1.4139e+07
LPC	LPC 22:4	22:4	6.229	+H	571.364	C30 H54 O7 N1 P1	B	7631000	7.63144e+06
LPE	LPE 16:0	16:0	5.708	+H	453.286	C21 H44 O7 N1 P1	B	833400	833378
LPE	LPE 16:0	16:0	6.176	+H	453.286	C21 H44 O7 N1 P1	B	8498000	8.498e+06
LPE	LPE 18:2	18:2	4.587	+H	477.286	C23 H44 O7 N1 P1	A	3680000	3.68009e+06
LPE	LPE 18:2	18:2	4.946	+H	477.286	C23 H44 O7 N1 P1	A	24380000	2.43788e+07
LPE	LPE 18:1	18:1	6.657	+H	479.301	C23 H46 O7 N1 P1	B	12020000	1.20231e+07
LPE	LPE 18:0	18:0	8.289	+H	481.317	C23 H48 O7 N1 P1	B	1040000	1.03992e+06
LPE	LPE 18:0	18:0	8.777	+H	481.317	C23 H48 O7 N1 P1	A	9656000	9.65551e+06
LPE	LPE 20:4	20:4	4.465	-H	501.286	C25 H44 O7 N1 P1	B	2081000	2.08134e+06
LPE	LPE 20:4	20:4	4.751	-H	501.286	C25 H44 O7 N1 P1	A	5296000	1.32412e+09
LPE	LPE 22:6	22:6	4.416	+H	525.285	C27 H44 O7 N1 P1	A	7008000	7.00796e+06
PC	PC 16:1_14:0	30:1	14.894	+H	703.515	C38 H74 O8 N1 P1	A	23810000	2.38055e+07
PC	PC O-16:0_16:0	O-32:0	17.794	+H	719.583	C40 H82 O7 N1 P1	B	61090000	6.10852e+07
PC	PC 14:0_18:2	32:2	15.168	+H	729.531	C40 H76 O8 N1 P1	A	201100000	2.51342e+10
PC	PC 16:0_16:1	32:1	16.125	+H	731.547	C40 H78 O8 N1 P1	A	457000000	437668
PC	PC 16:0_16:0	32:0	17.125	+H	733.562	C40 H80 O8 N1 P1	A	284800000	2.84802e+08
PC	PC O-16:1_18:2	O-34:3	16.959	+H	741.567	C42 H80 O7 N1 P1	B	312200000	3.12227e+08
PC	PC 15:0_18:2	33:2	15.786	+H	743.547	C41 H78 O8 N1 P1	A	104400000	1.04369e+08
PC	PC O-16:0_18:2	O-34:2	17.142	+H	743.583	C42 H82 O7 N1 P1	B	119500000	1.19454e+08
PC	PC O-16:1_18:1	O-34:2	17.707	+H	743.583	C42 H82 O7 N1 P1	B	114900000	1.14908e+08
PC	PC 17:1_16:0	33:1	16.69	+H	745.562	C41 H80 O8 N1 P1	A	137200000	53404.4
PC	PC O-18:1_16:0	O-34:1	17.819	+H	745.598	C42 H84 O7 N1 P1	B	202100000	2.02125e+08
PC	PC 14:0_20:4	34:4	14.95	+H	753.531	C42 H76 O8 N1 P1	B	64780000	6.47801e+07
PC	PC 16:0_18:3	34:3	15.758	+H	755.547	C42 H78 O8 N1 P1	A	216900000	135526
PC	PC 16:1_18:2	34:3	15.315	+H	755.547	C42 H78 O8 N1 P1	A	261200000	2.61227e+08
PC	PC 16:0_18:2	34:2	16.32	+H	757.562	C42 H80 O8 N1 P1	A	9435000000	1.58407e+07
PC	PC 16:0_18:1	34:1	17.193	+H	759.578	C42 H82 O8 N1 P1	A	4373000000	6.05442e+06
PC	PC 18:0_16:0	34:0	17.958	+H	761.593	C42 H84 O8 N1 P1	A	61190000	6.11907e+07
PC	PC O-16:1_20:4	O-36:5	16.719	+H	765.567	C44 H80 O7 N1 P1	A	584900000	5.84901e+08
PC	PC 15:0_20:4	35:4	15.576	+H	767.547	C43 H78 O8 N1 P1	B	43160000	4.31623e+07
PC	PC O-16:0_20:4	O-36:4	16.936	+H	767.583	C44 H82 O7 N1 P1	B	601300000	6.01253e+08
PC	PC 17:1_18:2	35:3	15.906	+H	769.562	C43 H80 O8 N1 P1	B	30790000	3.07931e+07
PC	PC 17:0_18:2	35:2	16.781	+H	771.578	C43 H82 O8 N1 P1	A	172600000	1.72609e+08
PC	PC O-18:1_18:1	O-36:2	17.875	+H	771.614	C44 H86 O7 N1 P1	B	37420000	3.74185e+07
PC	PC 17:0_18:1	35:1	17.655	+H	773.593	C43 H84 O8 N1 P1	A	142700000	1.42723e+08
PC	PC 16:0_20:5	36:5	15.376	+H	779.547	C44 H78 O8 N1 P1	A	643000000	6.43049e+08
PC	PC 16:1_20:4	36:5	15.113	+H	779.547	C44 H78 O8 N1 P1	A	74640000	7.46392e+07
PC	PC 18:3_18:2	36:5	14.686	+H	779.547	C44 H78 O8 N1 P1	B	26830000	2.68328e+07
PC	PC 16:0_20:4	36:4	16.149	+H	781.562	C44 H80 O8 N1 P1	A	5085000000	5.08522e+09
PC	PC 18:2_18:2	36:4	15.554	+H	781.562	C44 H80 O8 N1 P1	A	1061000000	1.06125e+09
PC	PC 16:0_20:3	36:3	16.504	+H	783.578	C44 H82 O8 N1 P1	A	1635000000	1.63465e+09
PC	PC 18:0_18:2	36:2	17.395	+H	785.593	C44 H84 O8 N1 P1	A	6386000000	3.21038e+06
PC	PC 18:0_18:1	36:1	17.995	+H	787.609	C44 H86 O8 N1 P1	A	1413000000	1.41301e+09
PC	PC O-18:2_20:4	O-38:6	16.592	+H	791.583	C46 H82 O7 N1 P1	B	46790000	4.67854e+07
PC	PC O-18:1_20:4	O-38:5	16.995	+H	793.598	C46 H84 O7 N1 P1	A	529000000	797445
PC	PC 17:0_20:4	37:4	16.556	+H	795.578	C45 H82 O8 N1 P1	A	52220000	5.22203e+07
PC	PC O-18:0_20:4	O-38:4	17.854	+H	795.614	C46 H86 O7 N1 P1	A	331400000	3.31406e+08
PC	PC 19:0_18:2	37:2	17.822	+H	799.609	C45 H86 O8 N1 P1	A	54900000	5.49037e+07
PC	PC 20:5_18:2	38:7	14.494	+H	803.547	C46 H78 O8 N1 P1	B	14280000	1.42846e+07
PC	PC 16:0_22:6	38:6	15.821	+H	805.562	C46 H80 O8 N1 P1	A	2034000000	2.03363e+09
PC	PC 18:2_20:4	38:6	15.338	+H	805.562	C46 H80 O8 N1 P1	A	357000000	3.56953e+08
PC	PC 18:0_20:5	38:5	16.566	+H	807.578	C46 H82 O8 N1 P1	A	629500000	6.29511e+08
PC	PC 18:1_20:4	38:5	16.246	+H	807.578	C46 H82 O8 N1 P1	A	1013000000	1.01307e+09
PC	PC 20:3_18:2	38:5	15.834	+H	807.578	C46 H82 O8 N1 P1	B	284200000	2.84161e+08
PC	PC 18:0_20:4	38:4	16.928	+H	809.593	C46 H84 O8 N1 P1	B	534900000	5.34904e+08
PC	PC 18:0_20:4	38:4	17.249	+H	809.593	C46 H84 O8 N1 P1	A	2710000000	2.70979e+09
PC	PC 18:1_20:3	38:4	16.767	+H	809.593	C46 H84 O8 N1 P1	A	250600000	2.50642e+08
PC	PC 18:0_20:3	38:3	17.618	+H	811.609	C46 H86 O8 N1 P1	A	1644000000	1.64366e+09
PC	PC 20:1_18:2	38:3	17.243	+H	811.609	C46 H86 O8 N1 P1	B	199100000	1.99087e+08
PC	PC 18:0_20:2	38:2	18.075	+H	813.625	C46 H88 O8 N1 P1	A	184800000	1.84761e+08
PC	PC 18:0_20:1	38:1	18.57	+H	815.64	C46 H90 O8 N1 P1	A	20250000	22011.6
PC	PC 20:4_20:4	40:8	15.067	+H	829.562	C48 H80 O8 N1 P1	B	47050000	4.70501e+07
PC	PC 18:1_22:6	40:7	15.939	+H	831.578	C48 H82 O8 N1 P1	A	114200000	1.14169e+08
PC	PC 20:3_20:4	40:7	15.637	+H	831.578	C48 H82 O8 N1 P1	B	27230000	2.72268e+07
PC	PC 18:0_22:6	40:6	16.949	+H	833.593	C48 H84 O8 N1 P1	A	731700000	7.3169e+08
PC	PC 18:0_22:5	40:5	17.274	+H	835.609	C48 H86 O8 N1 P1	A	171200000	1.71157e+08
PC	PC 18:1_22:4	40:5	16.974	+H	835.609	C48 H86 O8 N1 P1	B	85510000	8.55075e+07
PC	PC 18:0_22:4	40:4	17.812	+H	837.625	C48 H88 O8 N1 P1	A	178600000	1.78645e+08
PE	PE 16:0_18:2	34:2	16.591	+H	715.515	C39 H74 O8 N1 P1	A	22820000	2.28153e+07
PE	PE 16:0_18:1	34:1	17.365	+H	717.531	C39 H76 O8 N1 P1	A	7151000	7.15104e+06
PE	PE O-16:1_20:4	O-36:5	16.995	+H	723.52	C41 H74 O7 N1 P1	A	56770000	5.67717e+07
PE	PE O-18:1_18:2	O-36:3	17.902	-H	727.552	C41 H78 O7 N1 P1	A	7220000	5747.83
PE	PE O-18:1_18:1	O-36:2	18.252	-H	729.567	C41 H80 O7 N1 P1	B	1438000	1.43764e+06
PE	PE 16:0_20:5	36:5	15.64	+H	737.5	C41 H72 O8 N1 P1	B	1201000	1.20141e+06
PE	PE 16:0_20:4	36:4	16.41	+H	739.515	C41 H74 O8 N1 P1	A	24790000	2.47884e+07
PE	PE 18:2_18:2	36:4	15.805	+H	739.515	C41 H74 O8 N1 P1	B	2720000	2.71998e+06
PE	PE 18:1_18:2	36:3	16.682	+H	741.531	C41 H76 O8 N1 P1	A	18430000	1.84316e+07
PE	PE 18:0_18:2	36:2	17.536	+H	743.547	C41 H78 O8 N1 P1	A	45250000	4.52549e+07
PE	PE 18:0_18:1	36:1	17.986	-H	745.562	C41 H80 O8 N1 P1	A	1591000	1.59102e+06
PE	PE O-16:1_22:6	O-38:7	16.665	-H	747.52	C43 H74 O7 N1 P1	A	16710000	1.67143e+07
PE	PE O-16:1_22:5	O-38:6	17.077	+H	749.536	C43 H76 O7 N1 P1	A	61380000	6.13754e+07
PE	PE O-18:2_20:4	O-38:6	17.021	+H	749.536	C43 H76 O7 N1 P1	A	55850000	5.58456e+07
PE	PE O-18:1_20:4	O-38:5	17.783	+H	751.552	C43 H78 O7 N1 P1	A	88800000	8.87994e+07
PE	PE O-18:1_20:3	O-38:4	17.884	+H	753.567	C43 H80 O7 N1 P1	A	6151000	6.15067e+06
PE	PE 16:0_22:6	38:6	16.085	+H	763.515	C43 H74 O8 N1 P1	A	24880000	2.48767e+07
PE	PE 18:2_20:4	38:6	15.601	+H	763.515	C43 H74 O8 N1 P1	B	1353000	1.35304e+06
PE	PE 16:0_22:5	38:5	16.799	-H	765.531	C43 H76 O8 N1 P1	A	1704000	1.70419e+06
PE	PE 18:1_20:4	38:5	16.509	+H	765.531	C43 H76 O8 N1 P1	A	19470000	19859.2
PE	PE 18:0_20:4	38:4	17.416	+H	767.547	C43 H78 O8 N1 P1	A	46330000	4.63325e+07
PE	PE 18:0_20:3	38:3	17.696	-H	769.562	C43 H80 O8 N1 P1	A	1589000	1.58933e+06
PE	PE O-18:2_22:6	O-40:8	16.743	-H	773.536	C45 H76 O7 N1 P1	B	3360000	3.3603e+06
PE	PE O-18:1_22:6	O-40:7	17.596	+H	775.552	C45 H78 O7 N1 P1	B	21650000	2.16523e+07
PE	PE 18:0_22:6	40:6	17.14	-H	791.547	C45 H78 O8 N1 P1	A	2916000	2.91586e+06
PE	PE 18:0_22:5	40:5	17.41	-H	793.562	C45 H80 O8 N1 P1	B	556600	556647
PE	PE 18:0_22:4	40:4	17.842	-H	795.578	C45 H82 O8 N1 P1	B	575100	575115
PI	PI 16:0_16:1	32:1	14.916	-H	808.51	C41 H77 O13 N0 P1	A	1109000	1.10876e+06
PI	PI 16:0_18:2	34:2	15.159	-H	834.526	C43 H79 O13 N0 P1	A	5624000	5.62372e+06
PI	PI 16:0_18:1	34:1	16.039	-H	836.542	C43 H81 O13 N0 P1	A	5382000	5.38201e+06
PI	PI 16:0_20:4	36:4	14.994	-H	858.526	C45 H79 O13 N0 P1	A	6106000	6.10626e+06
PI	PI 18:1_18:2	36:3	15.282	-H	860.542	C45 H81 O13 N0 P1	A	1848000	1.84843e+06
PI	PI 18:0_18:2	36:2	16.264	+NH4	862.557	C45 H83 O13 N0 P1	A	10760000	1.07588e+07
PI	PI 18:0_18:1	36:1	17.034	-H	864.573	C45 H85 O13 N0 P1	A	4253000	2618.16
PI	PI 17:0_20:4	37:4	15.577	-H	872.542	C46 H81 O13 N0 P1	A	459600	459639
PI	PI 16:0_22:6	38:6	14.661	-H	882.526	C47 H79 O13 N0 P1	A	565400	565436
PI	PI 18:1_20:4	38:5	15.1	+NH4	884.542	C47 H81 O13 N0 P1	A	2035000	2.03475e+06
PI	PI 18:0_20:4	38:4	16.123	+NH4	886.557	C47 H83 O13 N0 P1	A	45300000	4.5297e+07
PI	PI 18:0_20:3	38:3	16.523	+NH4	888.573	C47 H85 O13 N0 P1	A	5270000	5.27044e+06
PI	PI 18:0_22:6	40:6	15.82	+NH4	910.557	C49 H83 O13 N0 P1	A	2093000	2.09304e+06
PI	PI 18:0_22:5	40:5	16.132	-H	912.573	C49 H85 O13 N0 P1	A	792500	7.92466e+07
PI	PI 18:0_22:4	40:4	16.795	-H	914.588	C49 H87 O13 N0 P1	A	668800	273.653
SM	SM d32:4	d32:4	13.167	+H	668.489	C37 H69 O6 N2 P1	C	982700	982709
SM	SM d18:2_14:0	d32:2	13.398	+H	672.521	C37 H73 O6 N2 P1	B	13860000	11206.2
SM	SM d32:1	d32:1	14.73	+H	674.536	C37 H75 O6 N2 P1	C	160000000	1.60021e+08
SM	SM d32:0	d32:0	15.254	+H	676.552	C37 H77 O6 N2 P1	C	4559000	4.55949e+06
SM	SM d33:2	d33:2	14.253	+H	686.536	C38 H75 O6 N2 P1	C	2010000	2.00978e+06
SM	SM d33:1	d33:1	15.401	+H	688.552	C38 H77 O6 N2 P1	C	76860000	7.68612e+07
SM	SM d34:5	d34:5	13.351	+H	694.505	C39 H71 O6 N2 P1	C	3557000	3.55718e+06
SM	SM d34:4	d34:4	14.732	+H	696.521	C39 H73 O6 N2 P1	C	35080000	3.50779e+07
SM	SM d34:2	d34:2	14.915	+H	700.552	C39 H77 O6 N2 P1	C	333600000	3.33613e+08
SM	SM d34:1	d34:1	16.033	+H	702.568	C39 H79 O6 N2 P1	C	1503000000	1.50293e+09
SM	SM d34:0	d34:0	16.495	+H	704.583	C39 H81 O6 N2 P1	C	46140000	2137.06
SM	SM d35:4	d35:4	15.425	+H	710.536	C40 H75 O6 N2 P1	C	12220000	1.22207e+07
SM	SM d35:2	d35:2	15.605	+H	714.568	C40 H79 O6 N2 P1	C	9285000	9.28473e+06
SM	SM t34:2	t34:2	14.393	+H	716.547	C39 H77 O7 N2 P1	C	1766000	1.76587e+06
SM	SM d35:1	d35:1	16.658	+H	716.583	C40 H81 O6 N2 P1	C	29690000	2.96885e+07
SM	SM t34:1	t34:1	15.572	+H	718.562	C39 H79 O7 N2 P1	C	3994000	3.99399e+06
SM	SM t34:0	t34:0	15.389	+H	720.578	C39 H81 O7 N2 P1	C	1902000	341.536
SM	SM d36:5	d36:5	14.91	+H	722.536	C41 H75 O6 N2 P1	C	68780000	6.8782e+07
SM	SM d36:4	d36:4	14.051	+H	724.552	C41 H77 O6 N2 P1	C	444100	444104
SM	SM d36:4	d36:4	16.028	+H	724.552	C41 H77 O6 N2 P1	C	72040000	7.20354e+07
SM	SM d18:1_18:2	d36:3	15.262	+H	726.568	C41 H79 O6 N2 P1	B	32650000	3.2654e+07
SM	SM d36:2	d36:2	16.227	+H	728.583	C41 H81 O6 N2 P1	C	172600000	1.72554e+08
SM	SM d36:1	d36:1	17.201	+H	730.599	C41 H83 O6 N2 P1	C	109300000	1.09337e+08
SM	SM d36:0	d36:0	17.569	+H	732.615	C41 H85 O6 N2 P1	C	6705000	6.70512e+06
SM	SM d37:1	d37:1	17.611	+H	744.615	C42 H85 O6 N2 P1	C	8202000	8.20234e+06
SM	SM d38:6	d38:6	15.249	+H	748.552	C43 H77 O6 N2 P1	C	5112000	5.11244e+06
SM	SM d38:5	d38:5	16.236	+H	750.568	C43 H79 O6 N2 P1	C	3884000	3.88409e+06
SM	SM d38:3	d38:3	16.477	+H	754.599	C43 H83 O6 N2 P1	C	5121000	5.12077e+06
SM	SM d38:2	d38:2	17.362	+H	756.615	C43 H85 O6 N2 P1	C	51510000	5.15124e+07
SM	SM d38:1	d38:1	18.041	+H	758.63	C43 H87 O6 N2 P1	C	106200000	1.06244e+08
SM	SM d38:0	d38:0	18.25	+H	760.646	C43 H89 O6 N2 P1	C	1476000	1838.17
SM	SM d39:2	d39:2	17.788	+H	770.63	C44 H87 O6 N2 P1	C	11510000	1.15139e+07
SM	SM d39:1	d39:1	18.357	+H	772.646	C44 H89 O6 N2 P1	C	31390000	3.13911e+07
SM	SM d40:3	d40:3	17.349	+H	782.63	C45 H87 O6 N2 P1	C	17980000	1.79759e+07
SM	SM d40:2	d40:2	18.078	+H	784.646	C45 H89 O6 N2 P1	C	323400000	3.23353e+08
SM	SM d40:1	d40:1	18.576	+H	786.662	C45 H91 O6 N2 P1	C	132400000	1.32419e+08
SM	SM d41:3	d41:3	17.779	+H	796.646	C46 H89 O6 N2 P1	C	16840000	1.6837e+07
SM	SM d41:2	d41:2	18.345	+H	798.662	C46 H91 O6 N2 P1	C	110700000	1.10736e+08
SM	SM d41:1	d41:1	18.864	+H	800.677	C46 H93 O6 N2 P1	C	33960000	3.39565e+07
SM	SM d42:5	d42:5	18.103	+H	806.63	C47 H87 O6 N2 P1	C	36540000	3.65442e+07
SM	SM d42:4	d42:4	17.459	+H	808.646	C47 H89 O6 N2 P1	C	70960000	7.09594e+07
SM	SM d42:3	d42:3	18.042	+H	810.662	C47 H91 O6 N2 P1	C	581000000	5.80975e+08
SM	SM d42:2	d42:2	18.482	+H	812.677	C47 H93 O6 N2 P1	C	603500000	6.03491e+08
SM	SM d42:1	d42:1	19.211	+H	814.693	C47 H95 O6 N2 P1	C	40110000	4.01101e+07
SM	SM d43:2	d43:2	18.654	+H	826.693	C48 H95 O6 N2 P1	C	18860000	1.88573e+07
SM	SM d44:6	d44:6	18.058	+H	832.646	C49 H89 O6 N2 P1	C	48670000	4.8667e+07
SM	SM d44:5	d44:5	18.484	+H	834.662	C49 H91 O6 N2 P1	C	109500000	4.37854e+09
SM	SM d44:3	d44:3	18.573	+H	838.693	C49 H95 O6 N2 P1	C	5068000	5.06774e+06
TG	TG 16:0_10:0_14:0	40:0	19.124	+NH4	694.611	C43 H82 O6	A	721200	17.852
TG	TG 10:0_14:0_18:1	42:1	19.128	+NH4	720.627	C45 H84 O6	A	1358000	115.679
TG	TG 16:0_10:0_18:2	44:2	19.138	+NH4	746.642	C47 H86 O6	A	1828000	194.789
TG	TG 16:0_10:0_18:1	44:1	19.272	+NH4	748.658	C47 H88 O6	A	1871000	49.698
TG	TG 10:0_18:1_18:2	46:3	19.147	+NH4	772.658	C49 H88 O6	A	1928000	434.996
TG	TG 16:1_12:0_18:1	46:2	19.279	+NH4	774.674	C49 H90 O6	A	3758000	93.515
TG	TG 16:0_14:0_16:1	46:1	19.413	+NH4	776.689	C49 H92 O6	A	2939000	64.487
TG	TG 12:0_18:2_18:2	48:4	19.15	+NH4	798.674	C51 H90 O6	B	17260000	11262.3
TG	TG 16:1_14:0_18:2	48:3	19.281	+NH4	800.689	C51 H92 O6	A	6238000	277.962
TG	TG 16:1_14:0_18:1	48:2	19.419	+NH4	802.705	C51 H94 O6	A	9228000	122.364
TG	TG 16:0_14:0_18:1	48:1	19.56	+NH4	804.721	C51 H96 O6	A	4359000	45.179
TG	TG 16:0_16:0_16:0	48:0	19.724	+NH4	806.736	C51 H98 O6	A	246100	1.422
TG	TG 15:0_16:1_18:1	49:2	19.487	+NH4	816.721	C52 H96 O6	A	694200	16.973
TG	TG 14:0_18:2_18:3	50:5	19.188	+NH4	824.689	C53 H92 O6	A	4069000	4.06911e+06
TG	TG 16:1_16:1_18:2	50:4	19.297	+NH4	826.705	C53 H94 O6	A	10270000	8837.27
TG	TG 16:0_16:1_18:2	50:3	19.413	+NH4	828.721	C53 H96 O6	A	20390000	2207.17
TG	TG 16:0_16:1_18:1	50:2	19.559	+NH4	830.736	C53 H98 O6	A	15620000	210.353
TG	TG 16:0_16:0_18:1	50:1	19.715	+NH4	832.752	C53 H100 O6	A	3237000	41.381
TG	TG 15:0_18:1_18:2	51:3	19.494	+NH4	842.736	C54 H98 O6	A	1254000	73.021
TG	TG 16:0_17:1_18:1	51:2	19.631	+NH4	844.752	C54 H100 O6	A	624300	20.514
TG	TG 16:1_18:2_18:3	52:6	19.208	+NH4	850.705	C55 H94 O6	A	6018000	6.01753e+06
TG	TG 16:1_18:2_18:2	52:5	19.319	+NH4	852.721	C55 H96 O6	A	16480000	9756.18
TG	TG 16:1_18:1_18:2	52:4	19.435	+NH4	854.736	C55 H98 O6	A	39090000	3017.07
TG	TG 16:0_18:1_18:2	52:3	19.556	+NH4	856.752	C55 H100 O6	A	34440000	730.412
TG	TG 16:0_18:1_18:1	52:2	19.685	+NH4	858.768	C55 H102 O6	A	10690000	100.927
TG	TG 17:0_18:1_18:2	53:3	19.629	+NH4	870.768	C56 H102 O6	A	409800	274.576
TG	TG 18:3_18:2_18:3	54:8	19.123	+NH4	874.705	C57 H94 O6	A	1975000	197531452
TG	TG 18:3_18:2_18:2	54:7	19.201	+NH4	876.721	C57 H96 O6	A	8752000	2747
TG	TG 18:2_18:2_18:2	54:6	19.315	+NH4	878.736	C57 H98 O6	A	15720000	1742.02
TG	TG 18:1_18:2_18:2	54:5	19.369	+NH4	880.752	C57 H100 O6	A	5660000	551.939
TG	TG 18:1_18:1_18:2	54:4	19.467	+NH4	882.768	C57 H102 O6	A	6315000	3660.51
TG	TG 18:1_18:1_18:1	54:3	19.667	+NH4	884.783	C57 H104 O6	A	3609000	24.223
TG	TG 18:0_18:1_18:1	54:2	19.868	+NH4	886.799	C57 H106 O6	A	272100	12.017
TG	TG 18:3_18:2_20:4	56:9	19.17	+NH4	900.721	C59 H96 O6	A	1816000	1.81609e+06
TG	TG 18:2_18:2_20:4	56:8	19.276	+NH4	902.736	C59 H98 O6	A	5085000	5.08492e+06
TG	TG 18:1_18:2_20:4	56:7	19.387	+NH4	904.752	C59 H100 O6	A	5853000	5.85251e+06
TG	TG 18:1_18:1_20:4	56:6	19.547	+NH4	906.768	C59 H102 O6	A	2928000	2.92818e+06

## Sheet: Dual
Class	LipidMolec	FA Group Key	BaseRt	MainIon	Calc Mass	Formula	MainGrade	Area	AreaRatio[sample/blank]
AcCa	AcCa 10:0	10:0	11.863	+H	315.241	C17 H33 O4 N1	A	15650000	1385.82
AcCa	AcCa 10:1	10:1	11.693	+H	313.225	C17 H31 O4 N1	A	13080000	1220.44
AcCa	AcCa 10:2	10:2	11.581	+H	311.21	C17 H29 O4 N1	A	1914000	279.249
AcCa	AcCa 10:3	10:3	11.527	+H	309.194	C17 H27 O4 N1	A	4581000	201.165
AcCa	AcCa 12:0	12:0	12.43	+H	343.272	C19 H37 O4 N1	A	6731000	656.69
AcCa	AcCa 12:1	12:1	12.041	+H	341.257	C19 H35 O4 N1	A	10080000	1997.96
AcCa	AcCa 14:1	14:1	12.831	+H	369.288	C21 H39 O4 N1	A	12630000	1006.54
AcCa	AcCa 14:2	14:2	12.269	+H	367.272	C21 H37 O4 N1	A	4790000	1711.58
AcCa	AcCa 16:0	16:0	15.775	+H	399.335	C23 H45 O4 N1	A	15690000	4804.18
AcCa	AcCa 18:0	18:0	18.334	+H	427.366	C25 H49 O4 N1	A	6535000	1458.53
AcCa	AcCa 18:1	18:1	16.228	+H	425.351	C25 H47 O4 N1	A	24470000	58.683
AcCa	AcCa 18:2	18:2	14.6	+H	423.335	C25 H45 O4 N1	A	15150000	16342.3
AcCa	AcCa 6:0	6:0	11.426	+H	259.178	C13 H25 O4 N1	A	1444000	5.193
AcCa	AcCa 8:0	8:0	11.574	+H	287.21	C15 H29 O4 N1	A	8012000	562.57
Cer	Cer d16:1_24:1	d40:2	28.638	+H	619.59	C40 H77 O3 N1	A	7303000	537.831
Cer	Cer d18:1_18:0	d36:1	28.243	+H	565.543	C36 H71 O3 N1	B	2268000	2.616
Cer	Cer d18:1_22:0	d40:1	28.868	+H	621.606	C40 H79 O3 N1	A	6965000	77.191
Cer	Cer d18:1_24:1	d42:2	28.848	+H	647.622	C42 H81 O3 N1	A	39530000	523.094
Cer	Cer d18:2_24:1	d42:3	28.619	+H	645.606	C42 H79 O3 N1	A	9018000	888.784
Cer	Cer d19:1_22:0	d41:1	28.968	+H	635.622	C41 H81 O3 N1	B	7414000	87.96
Cer	Cer d19:1_24:0	d43:1	29.117	+H	663.653	C43 H85 O3 N1	B	2820000	153.299
Cer	Cer d19:1_24:1	d43:2	28.906	+H	661.637	C43 H83 O3 N1	A	4283000	170.548
Cer	Cer m18:0_24:1	m42:1	29.087	+H	633.642	C42 H83 O2 N1	B	5072000	607.459
Cer	Cer m18:1_22:0	m40:1	28.891	+H	605.611	C40 H79 O2 N1	B	3882000	539.889
Cer	Cer m18:1_23:0	m41:1	28.997	+H	619.627	C41 H81 O2 N1	B	1612000	6.44956e+07
Cer	Cer m18:1_24:1	m42:2	28.88	+H	631.627	C42 H81 O2 N1	B	3021000	3.87297e+07
CE	CE 18:1	18:1	30.761	+NH4	650.6	C45 H78 O2	B	2713000	2.71342e+06
CE	CE 18:2	18:2	30.485	+NH4	648.585	C45 H76 O2	B	54290000	5.4293e+07
CE	CE 20:4	20:4	30.306	+NH4	672.585	C47 H76 O2	B	10820000	1.08158e+07
DG	DG 16:0_16:0	32:0	28.492	+NH4	568.507	C35 H68 O5	A	2417000	156.479
DG	DG 16:0_18:1	34:1	28.51	+NH4	594.522	C37 H70 O5	A	14620000	205.191
DG	DG 16:1_18:1	34:2	28.209	+NH4	592.507	C37 H68 O5	A	17960000	3109.58
DG	DG 18:0_16:0	34:0	28.783	+NH4	596.538	C37 H72 O5	A	3079000	20.489
DG	DG 18:0_18:0	36:0	29.001	+NH4	624.569	C39 H76 O5	A	1603000	5.058
DG	DG 18:0_18:1	36:1	28.793	+NH4	622.554	C39 H74 O5	A	2446000	429.841
DG	DG 18:1_18:1	36:2	28.527	+NH4	620.538	C39 H72 O5	A	37390000	242.728
DG	DG 18:1_18:2	36:3	28.235	+NH4	618.522	C39 H70 O5	A	58080000	2234.14
DG	DG 18:1_20:4	38:5	28.126	+NH4	642.522	C41 H70 O5	A	10480000	1.04771e+07
DG	DG 18:1_22:4	40:5	28.42	+NH4	670.554	C43 H74 O5	B	1267000	6.67081e+07
DG	DG 18:2_18:2	36:4	27.843	+NH4	616.507	C39 H68 O5	A	17150000	50.24
DG	DG 18:2_20:4	38:6	27.667	+NH4	640.507	C41 H68 O5	A	5457000	1366.44
Hex2Cer	Hex2Cer d18:1_16:0	d34:1	26.128	+H	861.618	C46 H87 O13 N1	A	24920000	330.626
Hex2Cer	Hex2Cer d18:1_24:1	d42:2	28.292	+H	971.727	C54 H101 O13 N1	A	5544000	777.933
HexCer	HexCer d18:1_16:0	d34:1	26.666	+H	699.565	C40 H77 O8 N1	A	6970000	33.31
HexCer	HexCer d18:1_22:0	d40:1	28.516	+H	783.659	C46 H89 O8 N1	A	7293000	38.689
HexCer	HexCer d18:1_24:1	d42:2	28.493	+H	809.674	C48 H91 O8 N1	A	17740000	1403.68
LPC	LPC 14:0	14:0	13.901	+H	467.301	C22 H46 O7 N1 P1	A	45320000	4.53166e+07
LPC	LPC 14:0	14:0	13.554	+H	467.301	C22 H46 O7 N1 P1	B	4378000	4.37797e+06
LPC	LPC 15:0	15:0	14.924	+H	481.317	C23 H48 O7 N1 P1	A	24450000	1126.18
LPC	LPC 15:0	15:0	14.482	+H	481.317	C23 H48 O7 N1 P1	B	3303000	2464.61
LPC	LPC 16:0	16:0	15.627	+H	495.332	C24 H50 O7 N1 P1	A	480000000	3748.31
LPC	LPC 16:0	16:0	16.118	+H	495.332	C24 H50 O7 N1 P1	A	5385000000	5752.31
LPC	LPC 16:1	16:1	14.294	+H	493.317	C24 H48 O7 N1 P1	A	106200000	31760.2
LPC	LPC 16:1	16:1	13.924	+H	493.317	C24 H48 O7 N1 P1	B	8341000	460.188
LPC	LPC 17:0	17:0	17.128	+H	509.348	C25 H52 O7 N1 P1	A	26160000	112193
LPC	LPC 17:0	17:0	17.493	+H	509.348	C25 H52 O7 N1 P1	A	43890000	39436
LPC	LPC 17:1	17:1	15.39	+H	507.332	C25 H50 O7 N1 P1	B	7922000	7.92155e+06
LPC	LPC 18:0	18:0	18.274	+H	523.364	C26 H54 O7 N1 P1	A	163000000	3693.36
LPC	LPC 18:0	18:0	18.817	+H	523.364	C26 H54 O7 N1 P1	A	1707000000	3658.26
LPC	LPC 18:1	18:1	16.118	+H	521.348	C26 H52 O7 N1 P1	A	65260000	356.647
LPC	LPC 18:1	18:1	16.615	+H	521.348	C26 H52 O7 N1 P1	A	912600000	29367.5
LPC	LPC 18:2	18:2	14.483	+H	519.332	C26 H50 O7 N1 P1	A	129900000	3120.24
LPC	LPC 18:2	18:2	14.876	+H	519.332	C26 H50 O7 N1 P1	A	1514000000	183747
LPC	LPC 18:3	18:3	13.659	+H	517.317	C26 H48 O7 N1 P1	B	11320000	13995.6
LPC	LPC 20:2	20:2	17.148	+H	547.364	C28 H54 O7 N1 P1	B	12240000	12227.9
LPC	LPC 20:3	20:3	15.616	+H	545.348	C28 H52 O7 N1 P1	A	95850000	22659.2
LPC	LPC 20:3	20:3	15.199	+H	545.348	C28 H52 O7 N1 P1	B	8786000	3061.62
LPC	LPC 20:4	20:4	14.32	+H	543.332	C28 H50 O7 N1 P1	A	34190000	777.178
LPC	LPC 20:4	20:4	14.649	+H	543.332	C28 H50 O7 N1 P1	A	323100000	12807.9
LPC	LPC 20:5	20:5	13.505	+H	541.317	C28 H48 O7 N1 P1	A	15390000	1.60319e+08
LPC	LPC 22:4	22:4	16.442	+H	571.364	C30 H54 O7 N1 P1	B	8219000	8.2191e+06
LPC	LPC 22:5	22:5	14.982	+H	569.348	C30 H52 O7 N1 P1	A	16800000	1.67988e+07
LPC	LPC 22:5	22:5	14.631	+H	569.348	C30 H52 O7 N1 P1	B	1693000	1.69304e+06
LPC	LPC 22:6	22:6	14.309	+H	567.332	C30 H50 O7 N1 P1	A	45680000	47237.1
LPC	LPC 22:6	22:6	14.019	+H	567.332	C30 H50 O7 N1 P1	B	4220000	648.549
LPC	LPC O-16:0	O-16:0	17.394	+H	481.353	C24 H52 O6 N1 P1	B	35760000	11510.6
LPC	LPC O-16:1	O-16:1	17.134	+H	479.338	C24 H50 O6 N1 P1	A	37790000	1.88956e+10
LPC	LPC O-18:0	O-18:0	20.176	+H	509.385	C26 H56 O6 N1 P1	B	10160000	4155.16
LPC	LPC O-18:1	O-18:1	17.808	+H	507.369	C26 H54 O6 N1 P1	B	21780000	2.17829e+07
LPC	LPC O-18:2	O-18:2	17.558	+H	505.353	C26 H52 O6 N1 P1	B	3813000	3.81298e+06
LPE	LPE 16:0	16:0	16.328	+H	453.286	C21 H44 O7 N1 P1	A	14330000	380.605
LPE	LPE 16:0	16:0	15.836	+H	453.286	C21 H44 O7 N1 P1	B	1501000	49.918
LPE	LPE 18:0	18:0	19.028	+H	481.317	C23 H48 O7 N1 P1	B	17670000	5512.45
LPE	LPE 18:1	18:1	16.821	-H	479.301	C23 H46 O7 N1 P1	A	7978000	4704.96
LPE	LPE 18:2	18:2	14.662	-H	477.286	C23 H44 O7 N1 P1	B	1800000	1.79987e+06
LPE	LPE 18:2	18:2	15.028	+H	477.286	C23 H44 O7 N1 P1	B	35870000	3.58656e+07
LPE	LPE 20:4	20:4	14.82	-H	501.286	C25 H44 O7 N1 P1	A	9895000	9.89508e+06
LPE	LPE 20:4	20:4	14.511	-H	501.286	C25 H44 O7 N1 P1	B	1273000	1.27285e+06
LPE	LPE 22:6	22:6	14.461	+H	525.285	C27 H44 O7 N1 P1	A	8991000	8.99066e+06
PC	PC 14:0_20:4	34:4	25.432	+H	753.531	C42 H76 O8 N1 P1	A	99330000	3045.51
PC	PC 15:0_18:2	33:2	26.335	+H	743.547	C41 H78 O8 N1 P1	A	195400000	12004.5
PC	PC 15:0_20:4	35:4	26.074	+H	767.547	C43 H78 O8 N1 P1	A	78480000	3518.78
PC	PC 16:0_14:0	30:0	26.59	+H	705.531	C38 H76 O8 N1 P1	A	137800000	3870.94
PC	PC 16:0_16:0	32:0	27.687	+H	733.562	C40 H80 O8 N1 P1	A	392900000	166.484
PC	PC 16:0_16:1	32:1	26.692	+H	731.547	C40 H78 O8 N1 P1	A	876000000	6349.27
PC	PC 16:0_18:1	34:1	27.717	+H	759.578	C42 H82 O8 N1 P1	A	10350000000	61.486
PC	PC 16:0_18:2	34:2	26.868	+H	757.562	C42 H80 O8 N1 P1	A	19960000000	96.567
PC	PC 16:0_18:3	34:3	26.166	+H	755.547	C42 H78 O8 N1 P1	A	237700000	4402.95
PC	PC 16:0_20:3	36:3	27.135	+H	783.578	C44 H82 O8 N1 P1	A	9342000000	31874.1
PC	PC 16:0_20:4	36:4	26.655	+H	781.562	C44 H80 O8 N1 P1	A	9018000000	1691.28
PC	PC 16:0_20:5	36:5	25.88	+H	779.547	C44 H78 O8 N1 P1	A	1199000000	16035.2
PC	PC 16:0_20:5	36:5	25.179	+H	779.547	C44 H78 O8 N1 P1	B	37460000	252.643
PC	PC 16:0_22:6	38:6	26.332	+H	805.562	C46 H80 O8 N1 P1	A	3514000000	6014.66
PC	PC 16:1_16:1	32:2	25.709	+H	729.531	C40 H76 O8 N1 P1	A	294800000	6963.26
PC	PC 16:1_18:2	34:3	25.836	+H	755.547	C42 H78 O8 N1 P1	A	456800000	6400.97
PC	PC 16:1_20:4	36:5	25.579	+H	779.547	C44 H78 O8 N1 P1	A	112200000	595.034
PC	PC 17:0_18:1	35:1	28.245	+H	773.593	C43 H84 O8 N1 P1	A	357400000	4856.44
PC	PC 17:0_18:2	35:2	27.54	+H	771.578	C43 H82 O8 N1 P1	A	666500000	167.876
PC	PC 17:0_20:3	37:3	27.666	+H	797.593	C45 H84 O8 N1 P1	A	92840000	3992.99
PC	PC 17:0_20:4	37:4	27.096	+H	795.578	C45 H82 O8 N1 P1	A	96430000	1382.04
PC	PC 17:1_16:0	33:1	27.287	+H	745.562	C41 H80 O8 N1 P1	B	185300000	5344.94
PC	PC 17:1_20:4	37:5	26.247	+H	793.562	C45 H80 O8 N1 P1	B	49130000	7692.77
PC	PC 18:0_16:0	34:0	28.755	+H	761.593	C42 H84 O8 N1 P1	A	232900000	1837.52
PC	PC 18:0_18:1	36:1	28.724	+H	787.609	C44 H86 O8 N1 P1	A	4473000000	12824.6
PC	PC 18:0_18:2	36:2	28.132	+H	785.593	C44 H84 O8 N1 P1	A	16070000000	61.959
PC	PC 18:0_20:2	38:2	28.967	+H	813.625	C46 H88 O8 N1 P1	A	573600000	9101.07
PC	PC 18:0_20:3	38:3	28.19	+H	811.609	C46 H86 O8 N1 P1	A	4300000000	25463.8
PC	PC 18:0_20:4	38:4	27.722	+H	809.593	C46 H84 O8 N1 P1	A	5021000000	87.353
PC	PC 18:0_22:4	40:4	28.45	+H	837.625	C48 H88 O8 N1 P1	A	495600000	6709.94
PC	PC 18:0_22:5	40:5	27.789	+H	835.609	C48 H86 O8 N1 P1	A	327400000	75.867
PC	PC 18:0_22:5	40:5	28.1	+H	835.609	C48 H86 O8 N1 P1	A	285700000	2223.93
PC	PC 18:0_22:6	40:6	27.507	+H	833.593	C48 H84 O8 N1 P1	A	1463000000	421.977
PC	PC 18:1_18:1	36:2	27.935	+H	785.593	C44 H84 O8 N1 P1	A	16080000000	110.116
PC	PC 18:1_20:4	38:5	26.749	+H	807.578	C46 H82 O8 N1 P1	A	1751000000	117.757
PC	PC 18:1_20:4	38:5	27.101	+H	807.578	C46 H82 O8 N1 P1	A	1566000000	6659.77
PC	PC 18:1_22:6	40:7	26.467	+H	831.578	C48 H82 O8 N1 P1	A	304500000	5495.51
PC	PC 18:2_20:4	38:6	25.823	+H	805.562	C46 H80 O8 N1 P1	A	1418000000	17711.9
PC	PC 19:0_18:2	37:2	28.504	+H	799.609	C45 H86 O8 N1 P1	A	125800000	17342.6
PC	PC 20:3_20:4	40:7	25.883	+H	831.578	C48 H82 O8 N1 P1	B	11720000	199.481
PC	PC 20:4_20:4	40:8	25.515	+H	829.562	C48 H80 O8 N1 P1	B	76850000	2621.95
PC	PC O-16:0_16:0	O-32:0	28.637	+H	719.583	C40 H82 O7 N1 P1	B	184900000	9031.38
PC	PC O-16:0_18:2	O-34:2	27.718	+H	743.583	C42 H82 O7 N1 P1	B	187600000	83.109
PC	PC O-16:0_20:3	O-36:3	27.898	+H	769.598	C44 H84 O7 N1 P1	B	83440000	36.04
PC	PC O-16:0_22:4	O-38:4	28.215	+H	795.614	C46 H86 O7 N1 P1	B	121900000	46.601
PC	PC O-16:0_22:5	O-38:5	28.245	+H	793.598	C46 H84 O7 N1 P1	B	271100000	3536.51
PC	PC O-16:1_16:0	O-32:1	28.311	+H	717.567	C40 H80 O7 N1 P1	B	173300000	11518.9
PC	PC O-16:1_18:1	O-34:2	28.312	+H	743.583	C42 H82 O7 N1 P1	B	285800000	40.037
PC	PC O-16:1_18:2	O-34:3	27.562	+H	741.567	C42 H80 O7 N1 P1	B	581200000	128.543
PC	PC O-16:1_20:4	O-36:5	27.287	+H	765.567	C44 H80 O7 N1 P1	B	752300000	310.443
PC	PC O-16:2_20:2	O-36:4	27.551	+H	767.583	C44 H82 O7 N1 P1	B	1157000000	115.001
PC	PC O-18:0_18:2	O-36:2	28.795	+H	771.614	C44 H86 O7 N1 P1	B	287700000	1057.96
PC	PC O-18:0_20:4	O-38:4	28.548	+H	795.614	C46 H86 O7 N1 P1	A	739800000	5629.96
PC	PC O-18:1_18:2	O-36:3	28.551	+H	769.598	C44 H84 O7 N1 P1	A	184200000	5591.85
PC	PC O-18:1_20:4	O-38:5	27.577	+H	793.598	C46 H84 O7 N1 P1	A	899100000	126.81
PC	PC O-18:2_20:4	O-38:6	27.277	+H	791.583	C46 H82 O7 N1 P1	B	222200000	473.798
PC	PC O-18:2_22:4	O-40:6	28.196	+H	819.614	C48 H86 O7 N1 P1	B	111400000	6189.19
PE	PE 16:0_18:1	34:1	27.634	-H	717.531	C39 H76 O8 N1 P1	A	4439000	9.47
PE	PE 16:0_18:2	34:2	26.91	+H	715.515	C39 H74 O8 N1 P1	A	29270000	4895.11
PE	PE 16:0_20:4	36:4	26.711	+H	739.515	C41 H74 O8 N1 P1	A	40100000	9687.38
PE	PE 16:0_20:5	36:5	25.945	+H	737.5	C41 H72 O8 N1 P1	B	1611000	1.61106e+06
PE	PE 16:0_22:6	38:6	26.377	+H	763.515	C43 H74 O8 N1 P1	A	46130000	22816
PE	PE 17:0_18:2	35:2	27.396	+H	729.531	C40 H76 O8 N1 P1	B	1835000	500.976
PE	PE 18:0_16:0	34:0	27.115	+Na	719.547	C39 H78 O8 N1 P1	A	15890000	1.58914e+07
PE	PE 18:0_18:1	36:1	28.192	+H	745.562	C41 H80 O8 N1 P1	A	21660000	1402.2
PE	PE 18:1_18:1	36:2	27.78	-H	743.547	C41 H78 O8 N1 P1	A	17930000	581.136
PE	PE 18:1_18:2	36:3	26.997	+H	741.531	C41 H76 O8 N1 P1	A	20060000	2.00609e+07
PE	PE 18:1_20:4	38:5	26.794	+H	765.531	C43 H76 O8 N1 P1	A	19250000	5276.33
PE	PE 18:2_18:2	36:4	26.11	+H	739.515	C41 H74 O8 N1 P1	A	5242000	268.625
PE	PE 18:2_20:4	38:6	25.89	+H	763.515	C43 H74 O8 N1 P1	B	2781000	2323.24
PE	PE O-16:1_18:1	O-34:2	28.005	-H	701.536	C39 H76 O7 N1 P1	B	2754000	2.75402e+06
PE	PE O-16:1_18:2	O-34:3	27.482	-H	699.52	C39 H74 O7 N1 P1	B	7176000	7.17573e+06
PE	PE O-18:1_18:2	O-36:3	28.114	+Na	727.552	C41 H78 O7 N1 P1	B	5089000	5.08883e+06
PE	PE O-18:2_18:2	O-36:4	27.533	+H	725.536	C41 H76 O7 N1 P1	A	49380000	8812.93
PE	PE O-18:2_20:4	O-38:6	27.252	+H	749.536	C43 H76 O7 N1 P1	A	97940000	13106.3
PE	PE O-18:2_22:4	O-40:6	28.005	+H	777.567	C45 H80 O7 N1 P1	A	23330000	1466.57
PE	PE O-20:2_18:2	O-38:4	28.099	+H	753.567	C43 H80 O7 N1 P1	A	11250000	1.12549e+07
PI	PI 16:0_16:1	32:1	25.212	+NH4	808.51	C41 H77 O13 N0 P1	A	2268000	2.26769e+06
PI	PI 16:0_18:1	34:1	26.331	+NH4	836.542	C43 H81 O13 N0 P1	A	18870000	1.88676e+07
PI	PI 16:0_18:2	34:2	25.454	+NH4	834.526	C43 H79 O13 N0 P1	A	17910000	6004.49
PI	PI 16:0_20:3	36:3	25.568	+NH4	860.542	C45 H81 O13 N0 P1	A	5554000	2256.15
PI	PI 16:0_20:4	36:4	25.283	+NH4	858.526	C45 H79 O13 N0 P1	A	16410000	1364.13
PI	PI 16:0_22:6	38:6	24.948	+NH4	882.526	C47 H79 O13 N0 P1	B	1504000	737.418
PI	PI 17:0_20:4	37:4	25.863	+NH4	872.542	C46 H81 O13 N0 P1	B	1369000	1.36944e+06
PI	PI 18:0_18:1	36:1	27.312	+NH4	864.573	C45 H85 O13 N0 P1	A	14550000	9531.05
PI	PI 18:0_20:3	38:3	26.803	+NH4	888.573	C47 H85 O13 N0 P1	A	14460000	1.44639e+07
PI	PI 18:0_20:3	38:3	27.125	+NH4	888.573	C47 H85 O13 N0 P1	A	3145000	3.14532e+06
PI	PI 18:0_20:4	38:4	26.404	+NH4	886.557	C47 H83 O13 N0 P1	A	171900000	4426.09
PI	PI 18:0_22:5	40:5	26.407	+NH4	912.573	C49 H85 O13 N0 P1	A	5124000	5.12381e+06
PI	PI 18:0_22:6	40:6	26.104	+NH4	910.557	C49 H83 O13 N0 P1	A	6153000	6.15277e+06
PI	PI 18:1_18:1	36:2	26.561	+NH4	862.557	C45 H83 O13 N0 P1	A	55180000	5629.27
PI	PI 18:1_20:4	38:5	25.421	+NH4	884.542	C47 H81 O13 N0 P1	A	6061000	6.06095e+06
SM	SM d17:0_21:6	d38:6	25.748	+H	748.552	C43 H77 O6 N2 P1	B	5278000	1536.51
SM	SM d18:1_22:3	d40:4	28.611	+H	780.615	C45 H85 O6 N2 P1	B	70840000	24354.2
SM	SM d18:1_23:3	d41:4	29.643	+H	794.63	C46 H87 O6 N2 P1	B	21950000	12654.6
SM	SM d18:1_24:3	d42:4	27.89	+H	808.646	C47 H89 O6 N2 P1	B	173200000	1815.92
SM	SM d32:0	d32:0	25.775	+H	676.552	C37 H77 O6 N2 P1	C	11880000	4661.07
SM	SM d32:1	d32:1	25.207	+H	674.536	C37 H75 O6 N2 P1	C	304300000	16114.5
SM	SM d32:2	d32:2	23.83	+H	672.521	C37 H73 O6 N2 P1	C	21120000	2458.11
SM	SM d32:4	d32:4	23.64	+H	668.489	C37 H69 O6 N2 P1	C	1824000	1.07283e+08
SM	SM d33:1	d33:1	25.915	+H	688.552	C38 H77 O6 N2 P1	C	229200000	10714.4
SM	SM d34:0	d34:0	27.049	+H	704.583	C39 H81 O6 N2 P1	C	155400000	1115.4
SM	SM d34:1	d34:1	26.533	+H	702.568	C39 H79 O6 N2 P1	C	4388000000	703.46
SM	SM d34:2	d34:2	25.388	+H	700.552	C39 H77 O6 N2 P1	C	676400000	13112.1
SM	SM d34:4	d34:4	25.208	+H	696.521	C39 H73 O6 N2 P1	C	31660000	3.16588e+07
SM	SM d35:1	d35:1	27.204	+H	716.583	C40 H81 O6 N2 P1	C	72580000	3855.09
SM	SM d35:2	d35:2	26.116	+H	714.568	C40 H79 O6 N2 P1	C	21650000	2.70584e+09
SM	SM d35:4	d35:4	25.916	+H	710.536	C40 H75 O6 N2 P1	C	25250000	2.52542e+07
SM	SM d36:0	d36:0	28.064	+H	732.615	C41 H85 O6 N2 P1	C	39660000	907.493
SM	SM d36:1	d36:1	27.69	+H	730.599	C41 H83 O6 N2 P1	C	548500000	1208.03
SM	SM d36:2	d36:2	26.753	+H	728.583	C41 H81 O6 N2 P1	C	363900000	7055.41
SM	SM d36:3	d36:3	25.761	+H	726.568	C41 H79 O6 N2 P1	C	60790000	76125.9
SM	SM d36:3	d36:3	27.022	+H	726.568	C41 H79 O6 N2 P1	C	20880000	1779.45
SM	SM d36:4	d36:4	26.531	+H	724.552	C41 H77 O6 N2 P1	C	313700000	2417.67
SM	SM d36:5	d36:5	25.417	+H	722.536	C41 H75 O6 N2 P1	C	77430000	1.29052e+10
SM	SM d37:1	d37:1	27.968	+H	744.615	C42 H85 O6 N2 P1	C	9276000	3557.81
SM	SM d37:1	d37:1	28.237	+H	744.615	C42 H85 O6 N2 P1	C	48380000	3859.54
SM	SM d38:1	d38:1	28.618	+H	758.63	C43 H87 O6 N2 P1	C	515700000	7676.4
SM	SM d38:2	d38:2	27.865	+H	756.615	C43 H85 O6 N2 P1	C	177500000	6023.7
SM	SM d38:5	d38:5	26.758	+H	750.568	C43 H79 O6 N2 P1	C	14810000	5.69543e+08
SM	SM d39:1	d39:1	29.652	+H	772.646	C44 H89 O6 N2 P1	C	168400000	1502.7
SM	SM d39:2	d39:2	28.366	+H	770.63	C44 H87 O6 N2 P1	C	39360000	16958.6
SM	SM d40:2	d40:2	28.752	+H	784.646	C45 H89 O6 N2 P1	C	1272000000	8245.07
SM	SM d40:2	d40:2	28.831	+H	784.646	C45 H89 O6 N2 P1	C	1274000000	15349
SM	SM d40:3	d40:3	27.852	+H	782.63	C45 H87 O6 N2 P1	C	102300000	4086.81
SM	SM d41:2	d41:2	29.651	+H	798.662	C46 H91 O6 N2 P1	C	528200000	2869.25
SM	SM d41:3	d41:3	28.337	+H	796.646	C46 H89 O6 N2 P1	C	51440000	9142.78
SM	SM d42:3	d42:3	28.613	+H	810.662	C47 H91 O6 N2 P1	C	1602000000	15154.7
SM	SM d42:4	d42:4	30.291	+H	808.646	C47 H89 O6 N2 P1	C	114100000	11037.9
SM	SM d42:5	d42:5	28.726	+H	806.63	C47 H87 O6 N2 P1	C	128300000	8718.96
SM	SM d43:3	d43:3	29.547	+H	824.677	C48 H93 O6 N2 P1	C	40380000	139.574
SM	SM d44:6	d44:6	28.609	+H	832.646	C49 H89 O6 N2 P1	C	160100000	8280.01
SM	SM t34:0	t34:0	25.871	+H	720.578	C39 H81 O7 N2 P1	C	7202000	1097.2
SM	SM t34:1	t34:1	26.03	+H	718.562	C39 H79 O7 N2 P1	C	15930000	3267.61
SM	SM t34:2	t34:2	24.826	+H	716.547	C39 H77 O7 N2 P1	C	3336000	1184.08
SM	SM t40:5	t40:5	27.556	+H	794.594	C45 H83 O7 N2 P1	C	233100000	386.851
TG	TG 10:0_14:0_18:1	42:1	29.246	+NH4	720.627	C45 H84 O6	A	4461000	14.487
TG	TG 10:0_18:1_18:2	46:3	29.267	+NH4	772.658	C49 H88 O6	B	6157000	14.129
TG	TG 12:0_18:2_18:2	48:4	29.278	+NH4	798.674	C51 H90 O6	A	8096000	46.94
TG	TG 15:0_16:1_18:1	49:2	29.689	+NH4	816.721	C52 H96 O6	A	59420000	50.86
TG	TG 15:0_16:1_18:2	49:3	29.484	+NH4	814.705	C52 H94 O6	A	2897000	8.51
TG	TG 15:0_18:2_18:2	51:4	29.496	+NH4	840.721	C54 H96 O6	A	4908000	81.303
TG	TG 16:0_10:0_12:0	38:0	29.075	+NH4	666.58	C41 H78 O6	A	2722000	1.688
TG	TG 16:0_10:0_14:0	40:0	29.239	+NH4	694.611	C43 H82 O6	A	2591000	2.097
TG	TG 16:0_12:0_14:0	42:0	29.39	+NH4	722.642	C45 H86 O6	A	3609000	1.969
TG	TG 16:0_12:0_16:1	44:1	29.388	+NH4	748.658	C47 H88 O6	A	7594000	8.468
TG	TG 16:0_14:0_16:1	46:1	29.547	+NH4	776.689	C49 H92 O6	A	16050000	8.135
TG	TG 16:0_14:0_18:1	48:1	29.708	+NH4	804.721	C51 H96 O6	A	41800000	10.935
TG	TG 16:0_16:0_16:0	48:0	29.877	+NH4	806.736	C51 H98 O6	A	8017000	1.039
TG	TG 16:0_16:0_18:1	50:1	29.868	+NH4	832.752	C53 H100 O6	A	65420000	10.446
TG	TG 16:0_16:1_18:1	50:2	29.702	+NH4	830.736	C53 H98 O6	A	157600000	60.073
TG	TG 16:0_16:1_18:2	50:3	29.554	+NH4	828.721	C53 H96 O6	A	110200000	127.234
TG	TG 16:0_17:1_18:1	51:2	29.783	+NH4	844.752	C54 H100 O6	A	7881000	7.308
TG	TG 16:0_18:1_18:1	52:2	29.863	+NH4	858.768	C55 H102 O6	A	185100000	30.72
TG	TG 16:0_18:1_18:2	52:3	29.712	+NH4	856.752	C55 H100 O6	A	362100000	243.225
TG	TG 16:0_18:1_22:6	56:7	29.512	+NH4	904.752	C59 H100 O6	A	39770000	5893.63
TG	TG 16:0_18:2_18:2	52:4	29.514	+NH4	854.736	C55 H98 O6	A	231900000	417.832
TG	TG 16:1_12:0_16:1	44:2	29.255	+NH4	746.642	C47 H86 O6	A	5948000	31.479
TG	TG 16:1_14:0_18:1	48:2	29.55	+NH4	802.705	C51 H94 O6	A	48800000	28.341
TG	TG 16:1_16:1_18:2	50:4	29.422	+NH4	826.705	C53 H94 O6	A	45960000	631.647
TG	TG 16:1_18:2_18:2	52:5	29.441	+NH4	852.721	C55 H96 O6	A	81310000	951.125
TG	TG 16:1_18:3_18:3	52:7	29.247	+NH4	848.689	C55 H92 O6	A	3798000	271.618
TG	TG 17:0_18:1_18:1	53:2	29.95	+NH4	872.783	C56 H104 O6	A	2442000	2.95
TG	TG 18:0_16:0_16:0	50:0	30.062	+NH4	834.768	C53 H102 O6	A	3382000	0.554
TG	TG 18:0_16:0_18:0	52:0	30.248	+NH4	862.799	C55 H106 O6	A	1130000	0.278
TG	TG 18:0_18:0_18:1	54:1	30.237	+NH4	888.815	C57 H108 O6	A	1431000	0.603
TG	TG 18:1_17:1_18:2	53:4	29.635	+NH4	868.752	C56 H100 O6	A	5411000	91.892
TG	TG 18:1_18:1_18:1	54:3	29.72	+NH4	884.783	C57 H104 O6	A	43500000	364.963
TG	TG 18:1_18:1_18:2	54:4	29.712	+NH4	882.768	C57 H102 O6	A	114800000	134.135
TG	TG 18:1_18:1_22:5	58:7	29.504	+NH4	932.783	C61 H104 O6	A	9828000	2418.94
TG	TG 18:1_18:2_18:2	54:5	29.443	+NH4	880.752	C57 H100 O6	A	24200000	396.555
TG	TG 18:1_18:2_18:3	54:6	29.44	+NH4	878.736	C57 H98 O6	A	77910000	349.892
TG	TG 18:1_18:2_22:6	58:9	29.448	+NH4	928.752	C61 H100 O6	A	6298000	765.874
TG	TG 18:2_14:2_18:2	50:6	29.199	+NH4	822.674	C53 H90 O6	A	3183000	3.18348e+06
TG	TG 18:2_17:1_18:2	53:5	29.502	+NH4	866.736	C56 H98 O6	A	2768000	57.361
TG	TG 18:2_18:2_20:4	56:8	29.411	+NH4	902.736	C59 H98 O6	A	22840000	701.413
TG	TG 18:3_18:2_18:3	54:8	29.253	+NH4	874.705	C57 H94 O6	A	6491000	1110.95
TG	TG 18:3_18:2_20:4	56:9	29.282	+NH4	900.721	C59 H96 O6	A	6412000	137.275
TG	TG 18:3_20:4_20:4	58:11	29.221	+NH4	924.721	C61 H96 O6	A	1514000	592.742

## Sheet: Exclusionlist
Class	LipidMolec	FA Group Key	BaseRt	MainIon	Calc Mass	Formula	MainGrade	Area	AreaRatio[sample/blank]
AcCa	AcCa 6:0	6:0	11.423	+H	259.178	C13 H25 O4 N1	A	3640000	18.428
AcCa	AcCa 8:0	8:0	11.572	+H	287.21	C15 H29 O4 N1	A	8247000	579.602
AcCa	AcCa 9:0	9:0	11.628	+H	301.225	C16 H31 O4 N1	A	2095000	56.161
AcCa	AcCa 10:3	10:3	11.525	+H	309.194	C17 H27 O4 N1	A	6817000	233.879
AcCa	AcCa 10:2	10:2	11.579	+H	311.21	C17 H29 O4 N1	A	2410000	351.625
AcCa	AcCa 10:1	10:1	11.691	+H	313.225	C17 H31 O4 N1	A	16630000	1052.89
AcCa	AcCa 10:0	10:0	11.848	+H	315.241	C17 H33 O4 N1	A	19620000	1080.4
AcCa	AcCa 11:1	11:1	11.827	+H	327.241	C18 H33 O4 N1	A	2760000	158.879
AcCa	AcCa 11:0	11:0	11.968	+H	329.257	C18 H35 O4 N1	A	1679000	92.561
AcCa	AcCa 12:2	12:2	11.875	+H	339.241	C19 H33 O4 N1	A	1983000	191.808
AcCa	AcCa 12:1	12:1	12.035	+H	341.257	C19 H35 O4 N1	A	12910000	1985.07
AcCa	AcCa 12:0	12:0	12.427	+H	343.272	C19 H37 O4 N1	A	8117000	989.351
AcCa	AcCa 13:0	13:0	12.723	+H	357.288	C20 H39 O4 N1	A	1946000	463.324
AcCa	AcCa 14:2	14:2	12.269	+H	367.272	C21 H37 O4 N1	A	5795000	2070.75
AcCa	AcCa 14:1	14:1	12.832	+H	369.288	C21 H39 O4 N1	A	12260000	977.696
AcCa	AcCa 14:0	14:0	13.624	+H	371.304	C21 H41 O4 N1	A	3278000	497.593
AcCa	AcCa 16:1	16:1	14.11	+H	397.319	C23 H43 O4 N1	A	3759000	1956.54
AcCa	AcCa 16:0	16:0	15.769	+H	399.335	C23 H45 O4 N1	A	18690000	17846.2
AcCa	AcCa 18:2	18:2	14.601	+H	423.335	C25 H45 O4 N1	A	18480000	19785.9
AcCa	AcCa 18:1	18:1	16.236	+H	425.351	C25 H47 O4 N1	A	26600000	63.973
AcCa	AcCa 18:0	18:0	18.332	+H	427.366	C25 H49 O4 N1	A	7406000	1741.41
CE	CE 16:1	16:1	30.469	+NH4	622.569	C43 H74 O2	B	1455000	1.4545e+06
CE	CE 18:2	18:2	30.461	+NH4	648.585	C45 H76 O2	B	179400000	1.79357e+08
CE	CE 18:1	18:1	30.751	+NH4	650.6	C45 H78 O2	B	12030000	1.20272e+07
CE	CE 20:5	20:5	30.1	+NH4	670.569	C47 H74 O2	B	1103000	1.10311e+06
CE	CE 20:4	20:4	30.297	+NH4	672.585	C47 H76 O2	B	61250000	6.1248e+07
CE	CE 20:3	20:3	30.485	+NH4	674.6	C47 H78 O2	B	7215000	7.21523e+06
CE	CE 22:6	22:6	30.145	+NH4	696.585	C49 H76 O2	B	2450000	2.44971e+06
Cer	Cer d18:1_18:0	d36:1	28.24	+H	565.543	C36 H71 O3 N1	B	3235000	14.993
Cer	Cer m18:1_20:0	m38:1	28.648	+H	577.58	C38 H75 O2 N1	B	1073000	1.07253e+06
Cer	Cer d18:2_20:0	d38:2	28.301	+H	591.559	C38 H73 O3 N1	B	985100	985108
Cer	Cer d16:1_22:0	d38:1	28.609	+H	593.575	C38 H75 O3 N1	B	3232000	145.01
Cer	Cer m18:1_22:0	m40:1	28.887	+H	605.611	C40 H79 O2 N1	B	4278000	595.062
Cer	Cer d18:2_22:0	d40:2	28.639	+H	619.59	C40 H77 O3 N1	B	7517000	662.774
Cer	Cer m18:1_23:0	m41:1	28.99	+H	619.627	C41 H81 O2 N1	B	1813000	317.44
Cer	Cer d19:2_22:6	d41:8	28.865	+H	621.512	C41 H67 O3 N1	B	1162000	3.31866e+07
Cer	Cer d18:1_22:0	d40:1	28.865	+H	621.606	C40 H79 O3 N1	B	20190000	223.778
Cer	Cer d18:0_22:0	d40:0	28.948	+H	623.622	C40 H81 O3 N1	A	3232000	13.363
Cer	Cer m18:1_24:1	m42:2	28.875	+H	631.627	C42 H81 O2 N1	B	3173000	3.17261e+06
Cer	Cer d18:2_23:0	d41:2	28.782	+H	633.606	C41 H79 O3 N1	B	6634000	6.63401e+06
Cer	Cer m18:1_24:0	m42:1	29.091	+H	633.642	C42 H83 O2 N1	B	5391000	1.45699e+08
Cer	Cer d18:1_23:0	d41:1	28.973	+H	635.622	C41 H81 O3 N1	A	21750000	257.976
Cer	Cer m18:0_24:0	m42:0	29.246	+H	635.658	C42 H85 O2 N1	B	1317000	205.08
Cer	Cer d18:0_23:0	d41:0	29.048	+H	637.637	C41 H83 O3 N1	B	1607000	68.133
Cer	Cer d18:2_24:1	d42:3	28.621	+H	645.606	C42 H79 O3 N1	A	9397000	926.195
Cer	Cer d18:1_24:1	d42:2	28.853	+H	647.622	C42 H81 O3 N1	A	53790000	900.493
Cer	Cer d18:1_24:0	d42:1	29.063	+H	649.637	C42 H83 O3 N1	A	63180000	464.144
Cer	Cer d19:1_24:1	d43:2	28.907	+H	661.637	C43 H83 O3 N1	A	5102000	583.201
Cer	Cer d19:1_24:0	d43:1	29.118	+H	663.653	C43 H85 O3 N1	B	7278000	229.32
DG	DG 16:0_16:0	32:0	28.488	+NH4	568.507	C35 H68 O5	A	2903000	187.905
DG	DG 16:1_18:1	34:2	28.208	+NH4	592.507	C37 H68 O5	A	17490000	3.97573e+08
DG	DG 16:0_18:1	34:1	28.505	+NH4	594.522	C37 H70 O5	A	14720000	413.446
DG	DG 18:0_16:0	34:0	28.783	+NH4	596.538	C37 H72 O5	A	4168000	36.048
DG	DG 18:3_18:2	36:5	27.38	+NH4	614.491	C39 H66 O5	A	2110000	2.11015e+06
DG	DG 16:0_20:4	36:4	28.092	+NH4	616.507	C39 H68 O5	A	2534000	15.031
DG	DG 18:2_18:2	36:4	27.832	+NH4	616.507	C39 H68 O5	A	17810000	821.663
DG	DG 18:1_18:2	36:3	28.236	+NH4	618.522	C39 H70 O5	A	58490000	7104.96
DG	DG 18:1_18:1	36:2	28.525	+NH4	620.538	C39 H72 O5	A	37490000	338.373
DG	DG 18:0_18:1	36:1	28.79	+NH4	622.554	C39 H74 O5	A	2703000	474.89
DG	DG 18:0_18:0	36:0	28.994	+NH4	624.569	C39 H76 O5	A	2812000	12.319
DG	DG 20:5_18:2	38:7	27.045	+NH4	638.491	C41 H66 O5	B	2330000	2.32998e+06
DG	DG 18:2_20:4	38:6	27.658	+NH4	640.507	C41 H68 O5	A	5601000	5.6007e+06
DG	DG 18:1_20:4	38:5	28.126	+NH4	642.522	C41 H70 O5	A	11210000	1.12087e+07
DG	DG 18:1_20:3	38:4	28.328	+NH4	644.538	C41 H72 O5	A	4546000	4.54603e+06
DG	DG 18:2_22:6	40:8	27.434	+NH4	664.507	C43 H68 O5	B	1673000	1.673e+06
DG	DG 18:1_22:5	40:6	28.275	+NH4	668.538	C43 H72 O5	B	1404000	1.40362e+06
DG	DG 18:1_22:4	40:5	28.411	+NH4	670.554	C43 H74 O5	A	1972000	1.9715e+06
Hex2Cer	Hex2Cer d16:1_16:0	d32:1	24.879	+H	833.586	C44 H83 O13 N1	A	1802000	59.235
Hex2Cer	Hex2Cer d18:2_16:0	d34:2	25.066	+H	859.602	C46 H85 O13 N1	A	1634000	555.086
Hex2Cer	Hex2Cer d18:1_16:0	d34:1	26.133	+H	861.618	C46 H87 O13 N1	A	26860000	1921.44
Hex2Cer	Hex2Cer d18:1_24:2	d42:3	27.959	+H	969.712	C54 H99 O13 N1	A	1841000	1.8412e+06
Hex2Cer	Hex2Cer d18:1_24:1	d42:2	28.292	+H	971.727	C54 H101 O13 N1	A	6817000	1747.16
Hex3Cer	Hex3Cer d18:1_16:0	d34:1	25.762	+H	1023.67	C52 H97 O18 N1	A	2900000	2.90029e+06
HexCer	HexCer d18:1_16:0	d34:1	26.668	+H	699.565	C40 H77 O8 N1	A	8474000	301.347
HexCer	HexCer d18:1_18:0	d36:1	27.618	+H	727.596	C42 H81 O8 N1	A	1102000	1.10202e+06
HexCer	HexCer d18:1_20:0	d38:1	28.198	+H	755.628	C44 H85 O8 N1	B	2017000	27.874
HexCer	HexCer d18:1_22:0	d40:1	28.515	+H	783.659	C46 H89 O8 N1	A	13390000	1220.05
HexCer	HexCer d18:1_23:0	d41:1	28.653	+H	797.674	C47 H91 O8 N1	B	4637000	272.356
HexCer	HexCer d18:1_24:1	d42:2	28.492	+H	809.674	C48 H91 O8 N1	B	19000000	1503.2
LPC	LPC 14:0	14:0	13.547	+H	467.301	C22 H46 O7 N1 P1	B	5702000	5.70248e+06
LPC	LPC 14:0	14:0	13.896	+H	467.301	C22 H46 O7 N1 P1	A	53340000	5.33393e+07
LPC	LPC O-16:2	O-16:2	16.143	+H	477.322	C24 H48 O6 N1 P1	B	2604000	1609.35
LPC	LPC O-16:1	O-16:1	17.122	+H	479.338	C24 H50 O6 N1 P1	A	43400000	21702005273
LPC	LPC 15:0	15:0	14.483	+H	481.317	C23 H48 O7 N1 P1	B	3836000	2811.55
LPC	LPC 15:0	15:0	14.919	+H	481.317	C23 H48 O7 N1 P1	A	35420000	1459.72
LPC	LPC O-16:0	O-16:0	17.376	+H	481.353	C24 H52 O6 N1 P1	B	40550000	13006.4
LPC	LPC 16:1	16:1	14.29	+H	493.317	C24 H48 O7 N1 P1	A	121800000	43589
LPC	LPC 16:0	16:0	15.617	+H	495.332	C24 H50 O7 N1 P1	A	519000000	2635.36
LPC	LPC 16:0	16:0	16.122	+H	495.332	C24 H50 O7 N1 P1	A	5144000000	5495.56
LPC	LPC O-18:2	O-18:2	17.538	+H	505.353	C26 H52 O6 N1 P1	B	4477000	4.47659e+06
LPC	LPC 17:1	17:1	15.384	+H	507.332	C25 H50 O7 N1 P1	B	9654000	9.65359e+06
LPC	LPC O-18:1	O-18:1	17.803	+H	507.369	C26 H54 O6 N1 P1	B	25790000	2.57892e+07
LPC	LPC O-18:1	O-18:1	18.214	+H	507.369	C26 H54 O6 N1 P1	B	4081000	4.08135e+06
LPC	LPC 17:0	17:0	17.117	+H	509.348	C25 H52 O7 N1 P1	A	31910000	3.19083e+07
LPC	LPC 17:0	17:0	17.484	+H	509.348	C25 H52 O7 N1 P1	A	51240000	45415.1
LPC	LPC O-18:0	O-18:0	20.163	+H	509.385	C26 H56 O6 N1 P1	B	12530000	5126.63
LPC	LPC 18:3	18:3	13.378	+H	517.317	C26 H48 O7 N1 P1	B	1295000	1601.66
LPC	LPC 18:3	18:3	13.659	+H	517.317	C26 H48 O7 N1 P1	A	13090000	16190
LPC	LPC 18:2	18:2	14.483	+H	519.332	C26 H50 O7 N1 P1	A	138000000	3688.3
LPC	LPC 18:2	18:2	14.87	+H	519.332	C26 H50 O7 N1 P1	A	1673000000	266478
LPC	LPC 18:1	18:1	16.117	+H	521.348	C26 H52 O7 N1 P1	A	120400000	654.125
LPC	LPC 18:1	18:1	16.611	+H	521.348	C26 H52 O7 N1 P1	A	995400000	37872.4
LPC	LPC 18:0	18:0	18.259	+H	523.364	C26 H54 O7 N1 P1	A	204400000	2559.88
LPC	LPC 18:0	18:0	18.807	+H	523.364	C26 H54 O7 N1 P1	A	1919000000	4108.13
LPC	LPC O-20:4	O-20:4	19.906	+H	529.353	C28 H52 O6 N1 P1	B	2085000	2.085e+06
LPC	LPC 19:1	19:1	17.803	+H	535.364	C27 H54 O7 N1 P1	B	3431000	3.43122e+06
LPC	LPC 19:0	19:0	20.141	+H	537.379	C27 H56 O7 N1 P1	B	4500000	4.50007e+06
LPC	LPC O-20:0	O-20:0	22.619	+H	537.416	C28 H60 O6 N1 P1	B	2557000	1091.21
LPC	LPC 20:5	20:5	13.493	+H	541.317	C28 H48 O7 N1 P1	A	18650000	1.8653e+07
LPC	LPC 20:4	20:4	14.319	+H	543.332	C28 H50 O7 N1 P1	A	36770000	636.642
LPC	LPC 20:4	20:4	14.646	+H	543.332	C28 H50 O7 N1 P1	A	368600000	14610.4
LPC	LPC 20:3	20:3	15.199	+H	545.348	C28 H52 O7 N1 P1	B	9763000	3252.11
LPC	LPC 20:3	20:3	15.613	+H	545.348	C28 H52 O7 N1 P1	A	111300000	26342.7
LPC	LPC 20:2	20:2	16.63	+H	547.364	C28 H54 O7 N1 P1	B	1861000	2.69738e+07
LPC	LPC 20:2	20:2	17.144	+H	547.364	C28 H54 O7 N1 P1	B	14560000	74491.7
LPC	LPC 20:1	20:1	19.092	+H	549.379	C28 H56 O7 N1 P1	B	13690000	1.36886e+07
LPC	LPC 20:1	20:1	19.515	+H	549.379	C28 H56 O7 N1 P1	B	1391000	1.39144e+06
LPC	LPC 20:0	20:0	21.393	+H	551.395	C28 H58 O7 N1 P1	B	10970000	1.09698e+07
LPC	LPC 22:6	22:6	14.015	+H	567.332	C30 H50 O7 N1 P1	B	4591000	835.172
LPC	LPC 22:6	22:6	14.308	+H	567.332	C30 H50 O7 N1 P1	A	53090000	55444.6
LPC	LPC 22:5	22:5	14.626	+H	569.348	C30 H52 O7 N1 P1	B	1887000	1.88744e+06
LPC	LPC 22:5	22:5	14.977	+H	569.348	C30 H52 O7 N1 P1	A	18260000	1.82577e+07
LPC	LPC 22:4	22:4	16.08	+H	571.364	C30 H54 O7 N1 P1	B	1129000	263.328
LPC	LPC 22:4	22:4	16.441	+H	571.364	C30 H54 O7 N1 P1	B	9198000	9.19795e+06
LPC	LPC 22:0	22:0	23.542	+H	579.426	C30 H62 O7 N1 P1	B	2414000	2.41351e+06
LPE	LPE 16:1	16:1	14.445	+H	451.27	C21 H42 O7 N1 P1	B	1135000	1.13513e+06
LPE	LPE 16:0	16:0	15.849	+H	453.286	C21 H44 O7 N1 P1	B	1483000	108.87
LPE	LPE 16:0	16:0	16.33	+H	453.286	C21 H44 O7 N1 P1	A	14140000	887.973
LPE	LPE 18:2	18:2	14.664	-H	477.286	C23 H44 O7 N1 P1	B	1821000	1.82114e+06
LPE	LPE 18:2	18:2	15.034	+H	477.286	C23 H44 O7 N1 P1	A	33390000	3.33921e+07
LPE	LPE 18:1	18:1	16.827	-H	479.301	C23 H46 O7 N1 P1	A	7911000	7.91118e+06
LPE	LPE 18:0	18:0	19.023	+H	481.317	C23 H48 O7 N1 P1	A	17890000	5582.35
LPE	LPE 20:4	20:4	14.515	-H	501.286	C25 H44 O7 N1 P1	B	1448000	1.44796e+06
LPE	LPE 20:4	20:4	14.824	-H	501.286	C25 H44 O7 N1 P1	A	9511000	9.51124e+06
LPE	LPE 22:6	22:6	14.196	+H	525.285	C27 H44 O7 N1 P1	B	1274000	2.77049e+07
LPE	LPE 22:6	22:6	14.469	+H	525.285	C27 H44 O7 N1 P1	A	8781000	8.78088e+06
PA	PA 18:1_18:2	36:3	31.982	-H	698.489	C39 H71 O8 N0 P1	B	742600	742580
PA	PA 18:1_18:1	36:2	31.957	-H	700.504	C39 H73 O8 N0 P1	B	835800	7.73
PC	PC 16:0_14:0	30:0	26.582	+H	705.531	C38 H76 O8 N1 P1	A	152300000	4370.16
PC	PC O-16:0_16:0	O-32:0	28.619	+H	719.583	C40 H82 O7 N1 P1	B	208100000	5718.51
PC	PC 14:0_18:2	32:2	25.704	+H	729.531	C40 H76 O8 N1 P1	A	313300000	16147.1
PC	PC 16:0_16:1	32:1	26.685	+H	731.547	C40 H78 O8 N1 P1	A	939800000	274.724
PC	PC 16:0_16:0	32:0	27.682	+H	733.562	C40 H80 O8 N1 P1	A	554700000	4374.59
PC	PC 16:1e_18:2	O-34:O-3	27.567	+H	741.567	C42 H80 O7 N1 P1	B	600100000	129.491
PC	PC 15:0_18:2	33:2	26.32	+H	743.547	C41 H78 O8 N1 P1	A	217500000	13361.9
PC	PC O-16:0_18:2	O-34:2	27.706	+H	743.583	C42 H82 O7 N1 P1	B	201500000	116.596
PC	PC O-16:1_18:1	O-34:2	28.321	+H	743.583	C42 H82 O7 N1 P1	B	317400000	7494.25
PC	PC 17:1_16:0	33:1	27.294	+H	745.562	C41 H80 O8 N1 P1	A	181700000	6519.36
PC	PC O-18:1_16:0	O-34:1	28.639	+H	745.598	C42 H84 O7 N1 P1	B	460000000	9061.43
PC	PC 14:0_20:4	34:4	25.418	+H	753.531	C42 H76 O8 N1 P1	A	98470000	2462.38
PC	PC 16:0_18:3	34:3	25.829	+H	755.547	C42 H78 O8 N1 P1	A	472000000	10377.9
PC	PC 16:0_18:3	34:3	26.132	+H	755.547	C42 H78 O8 N1 P1	A	291200000	5656.08
PC	PC 16:0_18:2	34:2	26.86	+H	757.562	C42 H80 O8 N1 P1	A	20570000000	86.39
PC	PC 16:0_18:1	34:1	27.715	+H	759.578	C42 H82 O8 N1 P1	A	9923000000	66.526
PC	PC 18:0_16:0	34:0	28.736	+H	761.593	C42 H84 O8 N1 P1	A	234500000	1849.66
PC	PC O-16:1_20:4	O-36:5	27.281	+H	765.567	C44 H80 O7 N1 P1	B	822100000	32567
PC	PC 15:0_20:4	35:4	26.067	+H	767.547	C43 H78 O8 N1 P1	A	82240000	20159.4
PC	PC O-16:2_20:2	O-36:4	27.542	+H	767.583	C44 H82 O7 N1 P1	B	1170000000	120.578
PC	PC 17:1_18:2	35:3	26.441	+H	769.562	C43 H80 O8 N1 P1	B	53560000	3902.81
PC	PC O-16:0_20:3	O-36:O-3	27.777	+H	769.598	C44 H84 O7 N1 P1	B	47880000	917.842
PC	PC O-18:1_18:2	O-36:3	28.556	+H	769.598	C44 H84 O7 N1 P1	B	238300000	7609.81
PC	PC 17:0_18:2	35:2	27.521	+H	771.578	C43 H82 O8 N1 P1	A	734200000	307.053
PC	PC O-18:0_18:2	O-36:2	28.799	+H	771.614	C44 H86 O7 N1 P1	B	330900000	1216.7
PC	PC 17:0_18:1	35:1	28.24	+H	773.593	C43 H84 O8 N1 P1	A	381600000	1904.91
PC	PC 16:0_20:5	36:5	25.88	+H	779.547	C44 H78 O8 N1 P1	A	1112000000	14876.6
PC	PC 16:1_20:4	36:5	25.575	+H	779.547	C44 H78 O8 N1 P1	A	119000000	1183.71
PC	PC 18:3_18:2	36:5	25.177	+H	779.547	C44 H78 O8 N1 P1	B	60600000	689.718
PC	PC 16:0_20:4	36:4	26.645	+H	781.562	C44 H80 O8 N1 P1	A	9324000000	13343.7
PC	PC 18:2_18:2	36:4	26.068	+H	781.562	C44 H80 O8 N1 P1	A	2021000000	7730.11
PC	PC 16:0_20:3	36:3	27.14	+H	783.578	C44 H82 O8 N1 P1	A	10630000000	38499.1
PC	PC 16:0_20:2	36:2	28.261	+H	785.593	C44 H84 O8 N1 P1	B	72070000	144.102
PC	PC 18:0_18:2	36:2	27.926	+H	785.593	C44 H84 O8 N1 P1	A	17280000000	13884.3
PC	PC 18:0_18:1	36:1	28.706	+H	787.609	C44 H86 O8 N1 P1	A	4637000000	67463.8
PC	PC 15:0_22:6	37:6	25.722	+H	791.547	C45 H78 O8 N1 P1	B	23620000	2.36158e+07
PC	PC O-18:2_20:4	O-38:6	27.205	+H	791.583	C46 H82 O7 N1 P1	A	79960000	800.263
PC	PC O-18:1_20:4	O-38:5	28.235	+H	793.598	C46 H84 O7 N1 P1	B	296900000	4658.83
PC	PC 17:0_20:4	37:4	27.093	+H	795.578	C45 H82 O8 N1 P1	A	105300000	1526.63
PC	PC O-16:0_22:4	O-38:4	28.209	+H	795.614	C46 H86 O7 N1 P1	B	141800000	1176.99
PC	PC O-18:1_20:3	O-38:4	27.927	+H	795.614	C46 H86 O7 N1 P1	B	40260000	192.179
PC	PC O-18:2_20:2	O-38:4	28.544	+H	795.614	C46 H86 O7 N1 P1	B	749400000	6673.58
PC	PC 17:0_20:3	37:3	27.657	+H	797.593	C45 H84 O8 N1 P1	B	91780000	3946.48
PC	PC 19:0_18:2	37:2	28.524	+H	799.609	C45 H86 O8 N1 P1	A	129500000	17843.7
PC	PC 16:1_22:6	38:7	25.208	+H	803.547	C46 H78 O8 N1 P1	B	28970000	488.532
PC	PC 16:0_22:6	38:6	26.331	+H	805.562	C46 H80 O8 N1 P1	A	3895000000	6666.09
PC	PC 18:2_20:4	38:6	25.814	+H	805.562	C46 H80 O8 N1 P1	A	700600000	8748.81
PC	PC 18:1_20:4	38:5	26.742	+H	807.578	C46 H82 O8 N1 P1	A	1793000000	66.39
PC	PC 18:1_20:4	38:5	27.096	+H	807.578	C46 H82 O8 N1 P1	A	1691000000	19621.3
PC	PC 18:0_20:4	38:4	27.755	+H	809.593	C46 H84 O8 N1 P1	A	5101000000	93.449
PC	PC 18:0_20:3	38:3	28.183	+H	811.609	C46 H86 O8 N1 P1	A	4254000000	26760.2
PC	PC 18:0_20:2	38:2	28.969	+H	813.625	C46 H88 O8 N1 P1	A	590100000	9513.07
PC	PC O-18:1_22:5	O-40:6	27.644	+H	819.614	C48 H86 O7 N1 P1	B	79300000	1033.4
PC	PC O-18:0_22:5	O-40:5	28.539	+H	821.63	C48 H88 O7 N1 P1	B	154800000	3742.2
PC	PC 20:4_20:4	40:8	25.513	+H	829.562	C48 H80 O8 N1 P1	A	82510000	2814.99
PC	PC 18:1_22:6	40:7	26.44	+H	831.578	C48 H82 O8 N1 P1	A	202400000	4673.54
PC	PC 20:3_20:4	40:7	26.124	+H	831.578	C48 H82 O8 N1 P1	A	47500000	1065.25
PC	PC 18:0_22:6	40:6	27.499	+H	833.593	C48 H84 O8 N1 P1	A	1442000000	449.982
PC	PC 18:1_22:5	40:6	26.799	+H	833.593	C48 H84 O8 N1 P1	B	37020000	7.935
PC	PC 18:0_22:5	40:5	27.797	+H	835.609	C48 H86 O8 N1 P1	A	342400000	4688.06
PC	PC 18:0_22:5	40:5	28.097	+H	835.609	C48 H86 O8 N1 P1	A	315400000	2455
PE	PE O-16:1_18:2	O-34:3	27.481	-H	699.52	C39 H74 O7 N1 P1	B	7159000	7.15851e+06
PE	PE O-16:1_18:1	O-34:2	28.003	-H	701.536	C39 H76 O7 N1 P1	A	2742000	2.74188e+06
PE	PE 16:0_18:2	34:2	26.909	+H	715.515	C39 H74 O8 N1 P1	A	28260000	7337.15
PE	PE 16:0_18:1	34:1	27.627	-H	717.531	C39 H76 O8 N1 P1	A	4318000	13.959
PE	PE O-16:1_20:4	O-36:5	27.299	-H	723.52	C41 H74 O7 N1 P1	B	22900000	2.28992e+07
PE	PE O-18:2_18:2	O-36:4	27.522	+H	725.536	C41 H76 O7 N1 P1	A	46060000	8120.99
PE	PE O-18:1_18:2	O-36:3	28.109	+Na	727.552	C41 H78 O7 N1 P1	B	6400000	6.39976e+06
PE	PE O-18:1_18:1	O-36:2	28.449	-H	729.567	C41 H80 O7 N1 P1	B	3399000	3.39897e+06
PE	PE 16:0_20:4	36:4	26.71	-H	739.515	C41 H74 O8 N1 P1	A	8819000	8.81905e+06
PE	PE 18:2_18:2	36:4	26.107	+H	739.515	C41 H74 O8 N1 P1	A	5436000	1865.54
PE	PE 18:1_18:2	36:3	27.005	-H	741.531	C41 H76 O8 N1 P1	A	8267000	8.26726e+06
PE	PE 18:1_18:1	36:2	27.778	-H	743.547	C41 H78 O8 N1 P1	A	19880000	557.825
PE	PE 18:0_18:1	36:1	28.187	+H	745.562	C41 H80 O8 N1 P1	A	22900000	1482.4
PE	PE O-18:2_20:4	O-38:6	27.202	+H	749.536	C43 H76 O7 N1 P1	A	9627000	7.64074e+07
PE	PE O-18:1_20:4	O-38:5	28.001	-H	751.552	C43 H78 O7 N1 P1	A	41960000	2786.3
PE	PE O-18:1_20:3	O-38:4	28.212	-H	753.567	C43 H80 O7 N1 P1	A	3069000	3.06866e+06
PE	PE O-20:1_18:2	O-38:3	28.524	-H	755.583	C43 H82 O7 N1 P1	B	1476000	1.47618e+06
PE	PE 18:2_20:4	38:6	25.881	+H	763.515	C43 H74 O8 N1 P1	B	2934000	3815.76
PE	PE 18:1_20:4	38:5	26.797	-H	765.531	C43 H76 O8 N1 P1	A	4313000	4.31304e+06
PE	PE 18:1_20:4	38:5	27.105	-H	765.531	C43 H76 O8 N1 P1	A	4825000	4.82484e+06
PE	PE 18:0_20:4	38:4	27.648	-H	767.547	C43 H78 O8 N1 P1	A	26210000	3854.18
PE	PE 18:0_20:3	38:3	27.914	-H	769.562	C43 H80 O8 N1 P1	A	2025000	2.02476e+06
PE	PE O-18:2_22:6	O-40:8	27.028	-H	773.536	C45 H76 O7 N1 P1	A	8752000	8.75231e+06
PE	PE O-18:1_22:6	O-40:7	27.821	-H	775.552	C45 H78 O7 N1 P1	A	8505000	8.5048e+06
PE	PE O-20:1_20:4	O-40:5	28.441	-H	779.583	C45 H82 O7 N1 P1	A	2836000	2.83558e+06
PE	PE 18:0_22:6	40:6	27.426	-H	791.547	C45 H78 O8 N1 P1	A	6414000	6.41377e+06
PE	PE 18:0_22:5	40:5	27.653	-H	793.562	C45 H80 O8 N1 P1	A	1329000	1.32881e+06
PE	PE 18:0_22:4	40:4	28.048	-H	795.578	C45 H82 O8 N1 P1	A	871500	871494
PE	PE O-20:1_22:6	O-42:7	28.315	+H	803.583	C47 H82 O7 N1 P1	B	4088000	4.08816e+06
PE	PE O-20:1_22:5	O-42:6	28.419	+H	805.598	C47 H84 O7 N1 P1	B	5337000	5.33741e+06
PI	PI 16:0_16:1	32:1	25.208	-H	808.51	C41 H77 O13 N0 P1	A	1851000	1.8508e+06
PI	PI 16:0_18:2	34:2	25.45	-H	834.526	C43 H79 O13 N0 P1	A	10590000	1.05921e+07
PI	PI 16:0_18:1	34:1	26.322	+NH4	836.542	C43 H81 O13 N0 P1	A	25120000	2.51206e+07
PI	PI 16:0_20:4	36:4	25.281	+NH4	858.526	C45 H79 O13 N0 P1	A	16220000	466.38
PI	PI 18:1_18:2	36:3	25.565	+NH4	860.542	C45 H81 O13 N0 P1	A	5833000	3822.59
PI	PI 18:0_18:2	36:2	26.563	+NH4	862.557	C45 H83 O13 N0 P1	A	49040000	5016.99
PI	PI 18:0_18:1	36:1	27.31	+NH4	864.573	C45 H85 O13 N0 P1	A	16600000	1.65971e+07
PI	PI 17:0_20:4	37:4	25.861	+NH4	872.542	C46 H81 O13 N0 P1	B	1262000	1.26237e+06
PI	PI 16:0_22:6	38:6	24.942	+NH4	882.526	C47 H79 O13 N0 P1	A	1498000	734.666
PI	PI 18:1_20:4	38:5	25.413	+NH4	884.542	C47 H81 O13 N0 P1	A	5968000	5967711
PI	PI 18:0_20:4	38:4	26.411	+NH4	886.557	C47 H83 O13 N0 P1	A	200600000	5159.24
PI	PI 18:0_20:3	38:3	26.798	+NH4	888.573	C47 H85 O13 N0 P1	A	13270000	1.32658e+07
PI	PI 18:0_20:3	38:3	27.127	+NH4	888.573	C47 H85 O13 N0 P1	A	3888000	3.88752e+06
PI	PI 18:0_22:6	40:6	26.103	+NH4	910.557	C49 H83 O13 N0 P1	A	6306000	6.30575e+06
PI	PI 18:0_22:5	40:5	26.414	+NH4	912.573	C49 H85 O13 N0 P1	A	5496000	5.49632e+06
PI	PI 18:0_22:4	40:4	27.09	+NH4	914.588	C49 H87 O13 N0 P1	B	2436000	2.4362e+06
PS	PS 18:2_22:6	40:8	26.378	-H	831.505	C46 H74 O10 N1 P1	B	1007000	1.00739e+06
SM	SM d30:1	d30:1	23.608	+H	646.505	C35 H71 O6 N2 P1	C	10920000	1.0921e+07
SM	SM d31:1	d31:1	24.412	+H	660.521	C36 H73 O6 N2 P1	C	4829000	4.82923e+06
SM	SM d32:4	d32:4	23.64	+H	668.489	C37 H69 O6 N2 P1	C	2486000	1.4624e+08
SM	SM d32:2	d32:2	23.821	+H	672.521	C37 H73 O6 N2 P1	C	24460000	2846.66
SM	SM d32:1	d32:1	25.196	+H	674.536	C37 H75 O6 N2 P1	C	359200000	19018.4
SM	SM d32:0	d32:0	25.747	+H	676.552	C37 H77 O6 N2 P1	C	13880000	1.388e+07
SM	SM d33:2	d33:2	24.7	+H	686.536	C38 H75 O6 N2 P1	C	4002000	4.00212e+06
SM	SM d33:1	d33:1	25.907	+H	688.552	C38 H77 O6 N2 P1	C	241700000	11298.8
SM	SM d33:0	d33:0	26.415	+H	690.568	C38 H79 O6 N2 P1	C	2547000	2.54683e+06
SM	SM d34:5	d34:5	23.816	+H	694.505	C39 H71 O6 N2 P1	C	1471000	1.47099e+06
SM	SM d34:4	d34:4	25.191	+H	696.521	C39 H73 O6 N2 P1	C	46010000	4.60074e+07
SM	SM d34:3	d34:3	25.741	+H	698.536	C39 H75 O6 N2 P1	C	1847000	1.84711e+06
SM	SM d18:1_16:1	d34:2	25.391	+H	700.552	C39 H77 O6 N2 P1	B	758400000	14700.1
SM	SM d34:1	d34:1	26.532	+H	702.568	C39 H79 O6 N2 P1	C	4644000000	3631.71
SM	SM d34:0	d34:0	27.038	+H	704.583	C39 H81 O6 N2 P1	C	159500000	1664.83
SM	SM d35:4	d35:4	25.914	+H	710.536	C40 H75 O6 N2 P1	C	32700000	3.26988e+07
SM	SM d35:2	d35:2	26.108	+H	714.568	C40 H79 O6 N2 P1	C	21660000	2.16602e+07
SM	SM d35:1	d35:1	27.141	+H	716.583	C40 H81 O6 N2 P1	C	73760000	6868.36
SM	SM t34:1	t34:1	26.016	+H	718.562	C39 H79 O7 N2 P1	C	17710000	5295.82
SM	SM d35:0	d35:0	27.623	+H	718.599	C40 H83 O6 N2 P1	C	2717000	1235.46
SM	SM d36:5	d36:5	25.391	+H	722.536	C41 H75 O6 N2 P1	C	112900000	1.12897e+08
SM	SM d36:4	d36:4	26.526	+H	724.552	C41 H77 O6 N2 P1	C	370800000	2857.93
SM	SM d36:3	d36:3	25.748	+H	726.568	C41 H79 O6 N2 P1	C	59760000	23770.9
SM	SM d36:2	d36:2	26.74	+H	728.583	C41 H81 O6 N2 P1	C	358400000	8750.15
SM	SM d20:0_16:1	d36:1	27.685	+H	730.599	C41 H83 O6 N2 P1	B	571200000	1257.9
SM	SM d36:0	d36:0	28.06	+H	732.615	C41 H85 O6 N2 P1	C	45550000	1042.25
SM	SM d37:5	d37:5	26.121	+H	736.552	C42 H77 O6 N2 P1	C	1938000	1.93773e+06
SM	SM d37:2	d37:2	27.41	+H	742.599	C42 H83 O6 N2 P1	C	11240000	1.12375e+07
SM	SM d37:1	d37:1	28.241	+H	744.615	C42 H85 O6 N2 P1	C	55300000	4410.51
SM	SM d38:6	d38:6	25.742	+H	748.552	C43 H77 O6 N2 P1	C	8309000	8.30931e+06
SM	SM d38:5	d38:5	26.742	+H	750.568	C43 H79 O6 N2 P1	C	18050000	1.80533e+07
SM	SM d38:4	d38:4	27.679	+H	752.583	C43 H81 O6 N2 P1	C	16950000	865.679
SM	SM d38:3	d38:3	26.801	+H	754.599	C43 H83 O6 N2 P1	C	7244000	2994.29
SM	SM d38:2	d38:2	27.857	+H	756.615	C43 H85 O6 N2 P1	C	191300000	6492.84
SM	SM d38:1	d38:1	28.616	+H	758.63	C43 H87 O6 N2 P1	C	703800000	10749.6
SM	SM d39:4	d39:4	28.265	+H	766.599	C44 H83 O6 N2 P1	C	5056000	780.488
SM	SM d39:2	d39:2	28.369	+H	770.63	C44 H87 O6 N2 P1	C	45350000	4.53498e+07
SM	SM d39:1	d39:1	29.601	+H	772.646	C44 H89 O6 N2 P1	C	32300000	804.414
SM	SM d40:5	d40:5	27.848	+H	778.599	C45 H83 O6 N2 P1	C	8327000	8.32749e+06
SM	SM d40:4	d40:4	27.103	+H	780.615	C45 H85 O6 N2 P1	C	4540000	679.377
SM	SM d18:2_22:1	d40:3	27.851	+H	782.63	C45 H87 O6 N2 P1	B	103600000	9246.56
SM	SM d40:2	d40:2	28.751	+H	784.646	C45 H89 O6 N2 P1	C	1404000000	28496.6
SM	SM d40:1	d40:1	30.48	+H	786.662	C45 H91 O6 N2 P1	C	1529000000	15299.9
SM	SM d18:2_23:3	d41:5	28.356	+H	792.615	C46 H85 O6 N2 P1	B	4681000	319.205
SM	SM d18:1_23:3	d41:4	29.573	+H	794.63	C46 H87 O6 N2 P1	B	26390000	2.63928e+07
SM	SM d41:3	d41:3	28.33	+H	796.646	C46 H89 O6 N2 P1	C	54030000	9571.13
SM	SM d41:2	d41:2	29.629	+H	798.662	C46 H91 O6 N2 P1	C	329700000	3982.07
SM	SM d42:5	d42:5	28.672	+H	806.63	C47 H87 O6 N2 P1	C	121400000	1.2141e+08
SM	SM d18:1_24:3	d42:4	27.884	+H	808.646	C47 H89 O6 N2 P1	B	165100000	3777.33
SM	SM d18:1_24:2	d42:3	28.601	+H	810.662	C47 H91 O6 N2 P1	B	1683000000	14116.5
SM	SM d42:2	d42:2	29.834	+H	812.677	C47 H93 O6 N2 P1	C	4271000000	94479.8
SM	SM d43:6	d43:6	28.335	+H	818.63	C48 H87 O6 N2 P1	C	8376000	8.37629e+06
SM	SM d43:5	d43:5	29.639	+H	820.646	C48 H89 O6 N2 P1	C	65820000	6.58215e+07
SM	SM d43:3	d43:3	29.547	+H	824.677	C48 H93 O6 N2 P1	C	43420000	341.418
SM	SM d43:2	d43:2	30.611	+H	826.693	C48 H95 O6 N2 P1	C	86580000	6925.23
SM	SM d44:7	d44:7	28.06	+H	830.63	C49 H87 O6 N2 P1	C	9295000	9.29516e+06
SM	SM d44:6	d44:6	28.588	+H	832.646	C49 H89 O6 N2 P1	C	226300000	17218.1
SM	SM d44:5	d44:5	29.803	+H	834.662	C49 H91 O6 N2 P1	C	420100000	23560.8
SM	SM d44:3	d44:3	30.507	+H	838.693	C49 H95 O6 N2 P1	C	22380000	2.23836e+07
TG	TG 10:0_12:0_14:0	36:0	28.911	+NH4	638.548	C39 H74 O6	A	4292000	4.232
TG	TG 12:0_12:0_14:0	38:0	29.075	+NH4	666.58	C41 H78 O6	A	3565000	5.248
TG	TG 16:0_10:0_14:0	40:0	29.24	+NH4	694.611	C43 H82 O6	A	4197000	7.408
TG	TG 10:0_14:0_18:1	42:1	29.244	+NH4	720.627	C45 H84 O6	A	7912000	75.771
TG	TG 16:0_12:0_14:0	42:0	29.399	+NH4	722.642	C45 H86 O6	A	5312000	7.848
TG	TG 16:1_10:0_18:1	44:2	29.253	+NH4	746.642	C47 H86 O6	A	11200000	117.77
TG	TG 18:1_12:0_14:0	44:1	29.393	+NH4	748.658	C47 H88 O6	A	13270000	49.914
TG	TG 16:0_14:0_14:0	44:0	29.549	+NH4	750.674	C47 H90 O6	A	8536000	8.126
TG	TG 15:0_14:0_16:0	45:0	29.62	+NH4	764.689	C48 H92 O6	A	3376000	3.539
TG	TG 16:1_12:0_18:2	46:3	29.26	+NH4	772.658	C49 H88 O6	A	12790000	102.739
TG	TG 16:0_14:0_16:1	46:1	29.547	+NH4	776.689	C49 H92 O6	A	37830000	60.921
TG	TG 16:0_14:0_16:0	46:0	29.709	+NH4	778.705	C49 H94 O6	A	15360000	9.099
TG	TG 16:1_13:0_18:2	47:3	29.333	+NH4	786.674	C50 H90 O6	B	1231000	43.781
TG	TG 15:0_14:0_18:2	47:2	29.473	+NH4	788.689	C50 H92 O6	A	3741000	14.108
TG	TG 15:0_16:0_16:1	47:1	29.616	+NH4	790.705	C50 H94 O6	A	4430000	11.289
TG	TG 12:0_18:2_18:2	48:4	29.276	+NH4	798.674	C51 H90 O6	A	18240000	204.662
TG	TG 16:1_14:0_18:1	48:2	29.547	+NH4	802.705	C51 H94 O6	A	124100000	206.324
TG	TG 16:0_14:0_18:1	48:1	29.699	+NH4	804.721	C51 H96 O6	A	98960000	123.217
TG	TG 16:0_16:0_16:0	48:0	29.879	+NH4	806.736	C51 H98 O6	A	31280000	16.246
TG	TG 15:0_16:1_18:2	49:3	29.483	+NH4	814.705	C52 H94 O6	A	6084000	61.945
TG	TG 15:0_16:0_18:2	49:2	29.684	+NH4	816.721	C52 H96 O6	A	92680000	182.366
TG	TG 18:2_14:2_18:2	50:6	29.206	+NH4	822.674	C53 H90 O6	A	5469000	5.46916e+06
TG	TG 18:2_14:1_18:2	50:5	29.303	+NH4	824.689	C53 H92 O6	A	24110000	1286.53
TG	TG 16:1_16:1_18:2	50:4	29.418	+NH4	826.705	C53 H94 O6	A	92810000	1306.72
TG	TG 16:0_16:1_18:2	50:3	29.554	+NH4	828.721	C53 H96 O6	A	274100000	906.679
TG	TG 16:0_16:1_18:1	50:2	29.699	+NH4	830.736	C53 H98 O6	A	371500000	515.445
TG	TG 16:0_16:0_18:1	50:1	29.868	+NH4	832.752	C53 H100 O6	A	230600000	256.3
TG	TG 18:0_16:0_16:0	50:0	30.057	+NH4	834.768	C53 H102 O6	A	12350000	9.629
TG	TG 15:0_18:2_18:3	51:5	29.383	+NH4	838.705	C54 H94 O6	A	2707000	92.101
TG	TG 15:0_18:2_18:2	51:4	29.49	+NH4	840.721	C54 H96 O6	A	11870000	913.047
TG	TG 15:0_18:1_18:2	51:3	29.63	+NH4	842.736	C54 H98 O6	A	25260000	302.965
TG	TG 16:0_17:1_18:1	51:2	29.776	+NH4	844.752	C54 H100 O6	A	23700000	128.954
TG	TG 16:0_17:0_18:1	51:1	29.939	+NH4	846.768	C54 H102 O6	A	7783000	22.085
TG	TG 16:1_18:3_18:3	52:7	29.243	+NH4	848.689	C55 H92 O6	A	6203000	271.286
TG	TG 16:1_18:2_18:3	52:6	29.45	+NH4	850.705	C55 H94 O6	A	36090000	3.60874e+07
TG	TG 16:1_18:2_18:2	52:5	29.443	+NH4	852.721	C55 H96 O6	A	166600000	1948.3
TG	TG 16:1_18:1_18:2	52:4	29.566	+NH4	854.736	C55 H98 O6	A	663100000	2067.55
TG	TG 16:0_18:1_18:2	52:3	29.709	+NH4	856.752	C55 H100 O6	A	890700000	1643.46
TG	TG 16:0_18:1_18:1	52:2	29.861	+NH4	858.768	C55 H102 O6	A	658100000	357.706
TG	TG 18:0_16:0_18:1	52:1	30.047	+NH4	860.783	C55 H104 O6	A	45930000	87.453
TG	TG 18:0_16:0_18:0	52:0	30.253	+NH4	862.799	C55 H106 O6	A	3871000	4.726
TG	TG 18:2_17:1_18:2	53:5	29.497	+NH4	866.736	C56 H98 O6	A	8029000	545.206
TG	TG 18:1_17:1_18:2	53:4	29.637	+NH4	868.752	C56 H100 O6	A	14620000	971.185
TG	TG 17:0_18:1_18:2	53:3	29.785	+NH4	870.768	C56 H102 O6	A	17040000	331.339
TG	TG 17:0_18:1_18:1	53:2	29.934	+NH4	872.783	C56 H104 O6	A	9443000	75.68
TG	TG 18:3_18:2_18:3	54:8	29.273	+NH4	874.705	C57 H94 O6	A	10130000	3.16521e+08
TG	TG 18:0_17:0_18:1	53:1	30.12	+NH4	874.799	C56 H106 O6	A	1042000	9.594
TG	TG 18:1_18:2_18:3	54:6	29.443	+NH4	878.736	C57 H98 O6	A	183800000	1074.84
TG	TG 18:1_18:2_18:2	54:5	29.458	+NH4	880.752	C57 H100 O6	A	21340000	522.552
TG	TG 18:1_18:1_18:2	54:4	29.716	+NH4	882.768	C57 H102 O6	A	298600000	688.717
TG	TG 18:0_18:1_18:2	54:3	29.862	+NH4	884.783	C57 H104 O6	A	208200000	92.531
TG	TG 18:0_18:0_18:1	54:1	30.241	+NH4	888.815	C57 H108 O6	A	5112000	20.142
TG	TG 18:0_18:0_18:0	54:0	30.451	+NH4	890.83	C57 H110 O6	A	1433000	2.082
TG	TG 18:3_18:2_20:5	56:10	29.182	+NH4	898.705	C59 H94 O6	B	1876000	121.719
TG	TG 18:3_18:2_20:4	56:9	29.282	+NH4	900.721	C59 H96 O6	A	12040000	946.155
TG	TG 16:0_18:2_22:6	56:8	29.424	+NH4	902.736	C59 H98 O6	A	45030000	2690.82
TG	TG 16:0_18:1_22:6	56:7	29.508	+NH4	904.752	C59 H100 O6	A	88150000	13643.2
TG	TG 18:1_18:1_20:4	56:6	29.649	+NH4	906.768	C59 H102 O6	A	91610000	7124.7
TG	TG 18:1_18:2_20:2	56:5	29.77	+NH4	908.783	C59 H104 O6	A	33700000	948.642
TG	TG 20:1_18:1_18:2	56:4	29.875	+NH4	910.799	C59 H106 O6	A	10470000	612.761
TG	TG 20:1_18:1_18:1	56:3	30.019	+NH4	912.815	C59 H108 O6	A	3447000	226.196
TG	TG 20:0_18:1_18:1	56:2	30.237	+NH4	914.83	C59 H110 O6	A	1495000	18.009
TG	TG 18:3_18:2_22:6	58:11	29.218	+NH4	924.721	C61 H96 O6	A	2533000	1.40706e+08
TG	TG 18:2_20:4_20:4	58:10	29.33	+NH4	926.736	C61 H98 O6	A	9685000	9.68458e+06
TG	TG 22:5_18:2_18:2	58:9	29.449	+NH4	928.752	C61 H100 O6	A	16970000	1391.19
TG	TG 18:1_18:2_22:4	58:7	29.64	+NH4	932.783	C61 H104 O6	A	13210000	3455.11
TG	TG 20:4_20:4_20:4	60:12	29.275	+NH4	950.736	C63 H98 O6	A	1668000	135.986

## Sheet: AdditionalInformation
RPLC-HRMS runs were analysed by Lipid Search 4.2
Abbr.	Lipid class	Criteria
DG	diglyceride	peak shape, main ion has to be +NH4, alkylfragments in spectra
TG	triglyceride	peak shape, main ion has to be +NH4, only FA with 10 carbons or higher
Cer	ceramide	main ion has to be +H
CE	cholesterol ester	main ion has to be +NH4
PE	phosphatidylethanolamine	in pos spectra: neutral loss of 104, in neg spectra: FA
LPE	lysophosphatidylethanolamine	main ion has to be +H or -H, peakshape and presence of twin peaks, FA distribution
PC	phosphatidylcholine	main ion has to be +H, headgroup fragments (m/z 184,86,104), retention time
LPC	lysophosphatidylcholine	main ion has to be +H, base peak m/z 184, peakshape and presence of twin peaks, FA distribution
PI	phosphatidylinositol	main ion has to be +NH4 or -H
PS	phosphatidylserine	main ion has to be -H
PA	phosphatidic acid	main ion has to be -H
SM	sphingomyelin	peak shape, main ion has to be +H, remove of low adundant duplicates
AcCa	acyl carnitine	remove of odd FA chains, FA distribution
HexCer	hexosyl ceramide	main ion has to be +H
Hex2Cer	dihexosyl ceramide	main ion has to be +H
The lipids were filtered by using Lipidsearch. For each lipid class specific criteria were chosen to remove false positive lipids within a short time. For most lipid classes, the main ion form, the peak shape and the absence of class specific fragments were manually controlled and the distribution of fatty acids should be biologically possible.
Main Grade	Explanation	Classes
A	lipid class and fatty acids are completely identified	The main grade was set to A and B for all lipid classes except SM
B	lipid class and some fatty acids are identified
C	lipid class or fatty acids are identified	For SM main grade A, B and C grade were allowed
Additional Info
number of hydroxy groups in the shingoid base (m for mono, di for di, t for tri, e for tetra)
plasmanyl (ether species)/plasmenyl (vinyl ether species) are marked with O- because Lipidsearch cannot distiguish between plasmanyl and plasmenyl lipids
	Number of replicates per polarity	Lipid Counts
RP only	N=4	269
Dual	N=4	268
Exclusionlist	N=3	372
